REVIEW PAPER

# Occurrence, phylogeny, structure, and function of catalases and peroxidases in cyanobacteria

Margit Bernroither<sup>1</sup>, Marcel Zamocky<sup>1,2</sup>, Paul G. Furtmüller<sup>1</sup>, Günter A. Peschek<sup>3</sup> and Christian Obinger<sup>1,\*</sup>

<sup>1</sup> BOKU—University of Natural Resources and Applied Life Sciences, Department of Chemistry, Metalloprotein Research Group, A-1190 Vienna, Austria

<sup>2</sup> Institute of Molecular Biology, Slovak Academy of Sciences, Dubravská cesta 21, SK-84251 Bratislava, Slovakia

<sup>3</sup> Institute of Physical Chemistry, Molecular Bioenergetics Group, University of Vienna, Althanstraße 14, A-1090 Vienna, Austria

Received 17 September 2008; Accepted 10 November 2008

## Abstract

Cyanobacteria have evolved  $\sim 3 \times 10^9$  years ago from ancient phototrophic microorganisms that already lived on our planet Earth. By opening the era of an aerobic, oxygen-containing biosphere, they are the true pacemakers of geological and biological evolution. Cyanobacteria must have been among the first organisms to elaborate mechanisms for the detoxification of partially reduced oxygen species including (hydrogen) peroxide. Since there is still an surprising lack of knowledge on the type, role, and mechanism(s) of peroxide-degrading enzymes in these bacteria, all 44 fully or partially sequenced genomes for haem and non-haem catalases and peroxidases have been critically analysed based on well known structure–function relationships of the corresponding oxidoreductases. It is demonstrated that  $H_2O_2$ -dismutating enzymes are mainly represented by bifunctional (haem) catalase–peroxidases and (binuclear) manganese catalases, with the latter being almost exclusively found in diazotrophic species. Several strains even lack a gene that encodes an enzyme with catalase activity. Two groups of peroxidases are found. Genes encoding putative (primordial) haem peroxidases (with homology to corresponding mammalian enzymes) and vanadium-containing iodoperoxidases are found only in a few species, whereas genes encoding peroxiredoxins (1-Cys, 2-Cys, type II, and Q-type) are ubiquitous in cyanobacteria. In addition,  $\sim 70\%$  contain NADPH-dependent glutathione peroxidase-like proteins. The occurrence and phylogeny of these enzymes is discussed, as well as the present knowledge of their physiological role(s).

**Key words:** Catalase–peroxidase, *Cyanobacterium*, glutathione peroxidase, manganese catalase, oxidative stress, peroxide detoxification, peroxiredoxin, vanadium peroxidase.

## Introduction

It is generally accepted by the scientific community that our aerobic biosphere ultimately dates back to the advent of cyanobacteria. Primordial blue-green algae (cyanobacteria) have evolved  $\sim 3 \times 10^9$  years ago from ancient phototrophic organisms that already lived on our planet Earth (Barghoorn, 1971; Rasmussen *et al.*, 2008). They had succeeded in linking photosynthetic electron flow from water as the (energy-requiring!) photoreductant through an oxygen-evolving com-

plex of a newly elaborated photosystem II (PSII), which is thought to have originated from a uniform primordial photosystem by gene duplication. The resulting tandem operation of two photosystems (namely a high-potential water-oxidizing PSII and a low-potential ferredoxin-reducing PSI) is now known as oxygenic or plant-type photosynthesis. This most decisive evolutionary step marked a turning point in evolution on our Earth, opening up the era of an aerobic,

\* To whom correspondence should be addressed. E-mail: christian.obinger@boku.ac.at

Abbreviations: KatG, catalase–peroxidase; MnCat, manganese catalase; PxDo, peroxidockerin; LPO, lactoperoxidase; DiHCCP, dihaem cytochrome c peroxidase; Prx, peroxiredoxin; GPx, glutathione peroxidase; LGT, lateral gene transfer; ORF, open reading frame; GSH, glutathione; GSSG, oxidized glutathione.

© The Author [2009]. Published by Oxford University Press [on behalf of the Society for Experimental Biology]. All rights reserved.

For Permissions, please e-mail: journals.permissions@oxfordjournals.org

oxygen-containing biosphere and atmosphere. The impact of this free dioxygen on the further evolution of life on Earth can hardly be overemphasized, and cyanobacteria thus introduce themselves as true pacemakers of (terrestrial) evolution, in both a geological and a biological sense.

Clearly, the first evolution of molecular O<sub>2</sub> must have been a deadly threat to all extant organisms in those anoxic days and it is logical to assume that cyanobacteria must have been among the first organisms to elaborate mechanisms for the detoxification of partially reduced, reactive oxygen species (ROS) originating from one- (i.e. O<sub>2</sub><sup>-</sup> or HO<sub>2</sub>) and two-electron reduction of O<sub>2</sub> (i.e. H<sub>2</sub>O<sub>2</sub>) (Regelsberger *et al.*, 2002).

Here, an analysis is presented of all 44 fully or partially sequenced cyanobacterial genomes (Table 1, August 2008) for peroxidases and catalases, which are ubiquitous oxidoreductases capable of the reductive heterolytic cleavage of the peroxidic bond, predominantly in hydrogen peroxide (H-O-O-H), but also in organic peroxides (R-O-O-H). Peroxidases reduce peroxides by means of two one-electron donors (Reaction 1) or one two-electron donor (Reaction 2). One-electron donors (AH) can be aromatic (e.g. phenols) or aliphatic [e.g. glutathione (GSH)] molecules, small inorganic anions (e.g. NO<sub>2</sub><sup>-</sup>), or even metal cations (e.g. Mn<sup>2+</sup>), and the corresponding oxidation product (e.g. a radical, <sup>•</sup>A) eventually dimerizes [e.g. forming glutathione disulphide (GSSG)]. Two-electron donors (X<sup>-</sup>) can be halides (chloride, bromide, iodide, or thiocyanate), with the corresponding oxidation product (HOX) being hypohalous acid or hypothiocyanate. In this respect, peroxidases that catalyse Reaction 2 are often denominated haloperoxidases (irrespective of the protein family that catalyses this reaction).

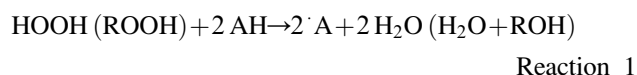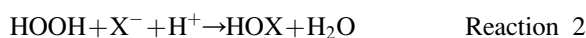

Catalases have the unique catalytic capacity to dismutate hydrogen peroxide (H<sub>2</sub>O<sub>2</sub>; Reaction 3) by their striking ability to evolve molecular oxygen (O<sub>2</sub>) by oxidation of H<sub>2</sub>O<sub>2</sub>.

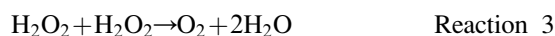

Several gene families evolved in the ancestral genomes capable of reduction of H<sub>2</sub>O<sub>2</sub> or organic peroxides. Among them are haem and non-haem oxidoreductases. Haem-containing enzymes can be divided in three main (super-)families, namely (i) typical or 'monofunctional' catalases found in all domains of life (Zamocky *et al.*, 2008a); (ii) the haem peroxidase superfamily with members in plants, fungi, protists, and (archaeo)bacteria (Welinder, 1992; Passardi *et al.*, 2007); and (iii) the peroxidase-cyclooxygenase superfamily also distributed in all domains of life (Zamocky *et al.*, 2008b). In addition, some other minor groups of haem-containing peroxidases are found, including the novel dye-decolorizing peroxidase family found in archaea, bacte-

ria, and fungi (Zubieta *et al.*, 2007) or bacterial dihaem peroxidases (Echalier *et al.*, 2006).

Non-haem peroxide-utilizing enzymes are manganese catalases (Zamocky *et al.*, 2008a), vanadium peroxidases (Littlechild, 1999), and ubiquitous thiol peroxidases (peroxy-iredoxins and glutathione peroxidases), which catalyse the reduction of peroxides by catalytic cysteine residues and thiol-containing proteins as reductants (Rouhier and Jacquot, 2005).

Based on similarity searches, multiple sequence alignments, and critical sequence analysis based on well known structure-function relationships, the occurrence, phylogeny, and physiological relevance of these oxidoreductases in phototrophic oxygenic cyanobacteria are described. This is discussed with respect to the knowledge of corresponding enzymes in higher plants, where photosynthesis is compartmentalized within the chloroplast that presumably derived from an endosymbiotic cyanobacterium.

## Results and discussion

H<sub>2</sub>O<sub>2</sub> is well known to have an inhibitory effect on the phototrophic growth of cyanobacteria (Samuilov *et al.*, 1999). Nevertheless, and despite their unique role in evolution, our understanding of the enzymatic mechanisms of H<sub>2</sub>O<sub>2</sub> degradation in cyanobacteria as well as the physiological role(s) of the various reported enzymes is scarce. Still often only enzymatic activities are described without precisely referring to the type of oxidoreductase that is actually responsible for the observed enzymatic conversions.

In the 1980s and even still in the beginning of the 1990s only crude extracts of cyanobacteria were tested for peroxide-degrading enzymes. Catalase activity (Tel-Or *et al.*, 1985), ascorbate peroxidase activity (Miyake *et al.*, 1991), and glutathione peroxidase activity (Tözüm and Gallon, 1979) have been reported. Originally, cyanobacteria were divided into two groups, those that have and those that lack ascorbate peroxidase (Miyake *et al.*, 1991). This was based on the observation that the first group scavenges H<sub>2</sub>O<sub>2</sub> with a peroxidase using a photoreductant as electron donor. Thus, it was thought that—similarly to chloroplasts—the oxidation products of ascorbate peroxidase are reduced by dehydroascorbate reductase (Hossain and Asada, 1984) and monodehydroascorbate reductase (Hossain and Asada, 1985), with glutathione and NADPH as electron donors (the production of both depending on photosynthetic activity). However, the concentration of ascorbate in the cyanobacterial cytosol (20–100 μM) is ~250-fold lower than in the stroma of chloroplasts (Tel-Or *et al.*, 1985), and analysis of cyanobacterial genomes (Passardi *et al.*, 2007) has demonstrated unequivocally that cyanobacteria do not contain ascorbate peroxidases.

Bifunctional catalase-peroxidases (KatGs) were the first H<sub>2</sub>O<sub>2</sub>-dismutating cyanobacterial enzymes which were characterized by both biochemical and genetic methods. KatGs were originally isolated from the unicellular species *Synechococcus* PCC7942 (Mutsuda *et al.*, 1996; Perelman *et al.*,

**Table 1.** List of abbreviations and access codes of all cyanobacterial genomes or catalase and peroxidase genes of all mentioned sequences

| Abbreviations                | Sequenced cyanobacteria                                            | Accession numbers |
|------------------------------|--------------------------------------------------------------------|-------------------|
| Aca.mar                      | <i>Acaryochloris marina</i> MBIC11017                              | YP_001516080      |
| Ana.var                      | <i>Anabaena variabilis</i> ATCC29413                               | YP_3214520.1      |
| Cro.wat                      | <i>Crocospaera watsonii</i> WH8501                                 | ZP_00514853       |
| Cya51142                     | <i>Cyanothece</i> sp. ATCC51142                                    | ZP_001804678      |
| Cya0110                      | <i>Cyanothece</i> sp. CCY0110                                      | ZP_01731923       |
| Cya7424                      | <i>Cyanothece</i> sp. PCC7424                                      | ZP_02974490       |
| Cya8801                      | <i>Cyanothece</i> sp. PCC8801                                      | ZP_02940003       |
| Glo.vio                      | <i>Gloeobacter violaceus</i> PCC7421                               | NP_925728         |
| Lyn8106                      | <i>Lyngbya</i> sp. PCC8106                                         | ZP_01623400       |
| Mic.aer                      | <i>Microcystis aeruginosa</i> NIES-843                             | YP_001655793      |
| Nod.spu                      | <i>Nodularia spumigena</i> CCY9414                                 | ZP_01628632       |
| Nos.pun                      | <i>Nostoc punctiforme</i> PCC73102                                 | YP_001868279      |
| Nos7120                      | <i>Nostoc (Anabaena)</i> sp. PCC7120                               | NP_485408         |
| Pro9601                      | <i>Prochlorococcus marinus</i> str. AS9601                         | YP_001009553      |
| Pro9211                      | <i>Prochlorococcus marinus</i> str. MIT9211                        | YP_001551018      |
| Pro9215                      | <i>Prochlorococcus marinus</i> str. MIT9215                        | YP_0014844393     |
| Pro9301                      | <i>Prochlorococcus marinus</i> str. MIT9301                        | YP_001091387      |
| Pro9303                      | <i>Prochlorococcus marinus</i> str. MIT9303                        | YP_001016925      |
| Pro9312                      | <i>Prochlorococcus marinus</i> str. MIT9312                        | YP_397563         |
| Pro9313                      | <i>Prochlorococcus marinus</i> str. MIT9313                        | NP_894962         |
| Pro9515                      | <i>Prochlorococcus marinus</i> str. MIT9515                        | NC_008817         |
| ProNATL1A                    | <i>Prochlorococcus marinus</i> str. NATL1A                         | YP_001015351      |
| ProNATL2A                    | <i>Prochlorococcus marinus</i> str. NATL2A                         | YP_291889         |
| Pro1375                      | <i>Prochlorococcus marinus</i> subsp. <i>marinus</i> str. CCMP1375 | NP_875535         |
| Pro1986                      | <i>Prochlorococcus marinus</i> subsp. <i>marinus</i> str. CCMP1986 | NP_893174         |
| Syn6301                      | <i>Synechococcus elongatus</i> PCC6301                             | YP_173174         |
| Syn7942                      | <i>Synechococcus elongatus</i> PCC7942                             | YP_400495         |
| Syn107                       | <i>Synechococcus</i> sp. BL107                                     | ZP_01468329       |
| Syn9311                      | <i>Synechococcus</i> sp. CC9311                                    | YP_730179         |
| Syn9605                      | <i>Synechococcus</i> sp. CC9605                                    | YP_382244         |
| Syn9902                      | <i>Synechococcus</i> sp. CC9902                                    | YP_376729         |
| SynJA23                      | <i>Synechococcus</i> sp. JA-2-3B'a(2-13)                           | YP_476915         |
| SynJA33                      | <i>Synechococcus</i> sp. JA-3-3Ab                                  | YP_47007          |
| Syn7002                      | <i>Synechococcus</i> sp. PCC7002                                   | YP_001733641      |
| Syn307                       | <i>Synechococcus</i> sp. RCC307                                    | YP_001226989      |
| Syn9916                      | <i>Synechococcus</i> sp. RS9916                                    | ZP_01470366       |
| Syn9917                      | <i>Synechococcus</i> sp. RS9917                                    | ZP_01080660       |
| Syn5701                      | <i>Synechococcus</i> sp. WH5701                                    | ZP_01084959       |
| Syn7803                      | <i>Synechococcus</i> sp. WH7803                                    | YP_001225319      |
| Syn7805                      | <i>Synechococcus</i> sp. WH7805                                    | ZP_01124489       |
| Syn8102                      | <i>Synechococcus</i> sp. WH8102                                    | NP_896813         |
| Syc6803                      | <i>Synechocystis</i> sp. PCC6803                                   | NP_441492         |
| The.elo                      | <i>Thermosynechococcus elongatus</i> BP-1                          | NP_683219         |
| Tri.ery                      | <i>Trichodesmium erythraeum</i> IMS101                             | YP_721847         |
| Non-cyanobacterial sequences |                                                                    |                   |
| Arch.ful.KatG                | <i>Archaeoglobus fulgidus</i> DSM 4304                             | NP_071058         |
| BcaMnCat                     | <i>Bacteroides caccae</i> ATCC 43185                               | ZP_01960863       |
| BcapMnCat                    | <i>Bacteroides capillosus</i> ATCC 29799                           | ZP_02036380       |
| BceMnCat                     | <i>Bacillus cereus</i> E33L                                        | YP_084426         |
| BcenMnCat                    | <i>Burkholderia cenocepacia</i> AU 1054                            | YP_621456         |
| BclMnCat                     | <i>Bacillus clausii</i> KSM-K16                                    | YP_175570         |
| BhaKatG                      | <i>Bacillus halodurans</i> C-125                                   | NP_241772         |
| BhaMnCat                     | <i>Bacillus halodurans</i> C-125                                   | NP_241935         |

**Table 1.** Continued

| Abbreviations  | Sequenced cyanobacteria                                                     | Accession numbers |
|----------------|-----------------------------------------------------------------------------|-------------------|
| BmaPxDo1       | <i>Blastopirellula marina</i> DSM 3645                                      | ZP_01093887       |
| B.t._LPO       | <i>Bos taurus</i>                                                           | NP_776358         |
| Bur.pse. KatG1 | <i>Burkholderia pseudomallei</i> K96243                                     | YP_109459         |
| DdPxDo1        | <i>Dictyostelium discoideum</i> AX4                                         | XP_642775         |
| E. coli HPI    | <i>Escherichia coli</i> str. K12 substr. MG1655                             | NP_418377         |
| E. coli KatP   | <i>Escherichia coli</i> O157:H7 EDL933                                      | YP_325577         |
| GtMnCat        | <i>Geobacillus thermodenitrificans</i> NG80-2                               | YP_001127084      |
| HalmaKatG1     | <i>Haloarcula marismortui</i> ATCC 43049                                    | YP_135827         |
| HalsaKatG      | <i>Halobacterium</i> sp. NRC-1                                              | NP_395796         |
| Leg.pn. KatG   | <i>Legionella pneumophila</i> subsp. <i>pneumophila</i> str. Philadelphia 1 | YP_094248         |
| LplMnCat1      | <i>Lactobacillus plantarum</i>                                              | P60355            |
| Ma. sp. KatG   | <i>Marinomonas</i> sp. MWYL1                                                | YP_001340448      |
| MagKatG1       | <i>Magnaporthe grisea</i> 70-15                                             | XP_361863         |
| MflaMnCat      | <i>Methylobacillus flagellatus</i> KT                                       | YP_545545         |
| Mic.mar. KatG  | <i>Microscilla marina</i> ATCC 23134                                        | ZP_01693331       |
| Msi KatG       | <i>Methylocella silvestris</i> BL2                                          | ZP_02946304       |
| MsiMnCat1      | <i>Methylocella silvestris</i> BL2                                          | ZP_02947034       |
| MspMnCat       | <i>Mesorhizobium</i> sp. BNC1                                               | YP_674434         |
| Myc.tub. KatG  | <i>Mycobacterium tuberculosis</i> H37Rv                                     | NP_216424         |
| NcrKatG1       | <i>Neurospora crassa</i> OR74A                                              | XP_959745         |
| NmoPxDo1       | <i>Nitrococcus mobilis</i> Nb-231                                           | ZP_01126301       |
| OsiPxDo1       | <i>Oryza sativa</i> Indica group                                            | CT836978          |
| PaerMnCat1     | <i>Pseudomonas aeruginosa</i> PAO1                                          | NP_250875         |
| PfMnCat1       | <i>Pseudomonas fluorescens</i> Pf-5                                         | YP_261802         |
| PimaPxDo1      | <i>Planctomyces maris</i> DSM 8797                                          | ZP_01857045       |
| Pse.put. KatG  | <i>Pseudomonas putida</i> KT2440                                            | NP_745804         |
| PYcaMnCat      | <i>Pyrobaculum caldifontis</i> JCM 11548                                    | YP_001055621      |
| RbaPxDo1       | <i>Rhodopirellula baltica</i> SH 1                                          | NP_869799         |
| RbaPxDo2       | <i>Rhodopirellula baltica</i> SH 1                                          | NP_864006         |
| ReMnCat        | <i>Ralstonia eutropha</i> JMP134                                            | YP_298605         |
| RpPxDo2        | <i>Rhodopseudomonas palustris</i> BisA53                                    | YP_783237         |
| RxMnCat        | <i>Rubrobacter xylanophilus</i> DSM 9941                                    | YP_643463         |
| Sal.typ. HPI   | <i>Salmonella typhimurium</i>                                               | CAA37187          |
| SarPxDo1       | <i>Salinispora arenicola</i> CNS-205                                        | YP_001537753      |
| SerMnCat       | <i>Saccharopolyspora erythraea</i> NRRL 2338                                | YP_001105249      |
| TtMnCat        | <i>Thermus thermophilus</i> HB27                                            | YP_005841         |
| Yer.pes. KatG  | <i>Yersinia pestis</i> CO92                                                 | NP_406785         |

2003), *Synechococcus* PCC6301 (Engleder *et al.*, 2000), and *Synechocystis* PCC6803 (Jakopitsch *et al.*, 1999; Tichy and Vermaas, 1999). Later on, the occurrence of a gene in *Nostoc punctiforme* that encodes a typical (monofunctional) catalase was reported, and also genes for putative manganese catalases (MnCATs) were ascribed to *N. punctiforme* and *Nostoc* sp. PCC7120 (Regelsberger *et al.*, 2002). Furthermore, it has been demonstrated that (multiple) genes for peroxiredoxins (Prxs) (Yamamoto *et al.*, 1999; Perelman *et al.*, 2003) and glutathione peroxidases (GPxs) (Gaber *et al.*, 2001) exist in cyanobacteria and that functional enzymes are expressed. Apparently, these enzymes (and not ascorbate peroxidase) were responsible for the 'photoreductant peroxidase' described earlier in the literature.

Now, the availability of 44 partially or fully sequenced genomes, together with improved knowledge on structure-function relationships, for the first time allows a more

systematic and comprehensive analysis of peroxide-degrading enzymes in cyanobacteria, thereby setting out the framework for future studies on expression and functional role(s).

### Catalases

Several gene families evolved in the ancestral genomes capable of H<sub>2</sub>O<sub>2</sub> dismutation according to Reaction 3. The most abundant are haem-containing enzymes that are spread among Bacteria, Archaea, and Eukarya. They are divided into two main groups, typical or ‘monofunctional’ catalases (EC 1.11.1.6) and KatGs. Both types of haem enzymes exhibit high catalase activities, but have significant differences, including absence of any sequence similarity and very different active site, tertiary, and quaternary structures. Enzymatic classification of bifunctional KatGs is not clear because, besides their catalase activity (EC 1.11.1.6, hydrogen peroxide, hydrogen peroxide oxidoreductase), they exhibit a peroxidase activity similar to that of conventional peroxidases (EC 1.11.1.7, hydrogen peroxide, donor oxidoreductase). Non-haem MnCats constitute a third (minor) group of enzymes with catalase activity. MnCats (EC 1.11.1.6), initially referred to as pseudo-catalases, are present only in bacteria.

*Typical (monofunctional) catalase:* Though being the largest group of H<sub>2</sub>O<sub>2</sub>-dismutating enzymes that segregated rather early in the evolution into three main clades through at least two gene-duplicating events (Zamocky *et al.*, 2008) and even occurring in anaerobic bacteria, it was interesting to see that genes for typical catalases are very unusual in cyanobacteria (Table 2). At the moment, the only complete and non-fused gene in which all essential amino acids of typical catalases are conserved (i.e. proximal haem ligand tyrosine and the conserved distal residues histidine, asparagine, and serine) (Zamocky *et al.*, 2008) is found in *N. punctiforme* PCC73102. The genome of this species in addition shows two open reading frames (ORFs) that encode MnCats (see below). *Nostoc punctiforme* catalase belongs to clade 3 of small-subunit catalases that contain haem *b* at the active site and use NADPH as a second redox-active cofactor. A recently performed phylogenetic analysis (Zamocky *et al.*, 2008) suggests a lateral gene transfer from an ancestral proteobacterium to *N. punctiforme*. Incomplete (C-terminal truncated) catalase genes are found in *Synechococcus elongatus* PCC7942 and *Cyanothece* sp. ATCC 51142. The putative proteins would contain all essential amino acids but lack the C-terminal  $\alpha$ -helical domain that is known to be essential in folding of typical catalases (Chelikani *et al.*, 2004). Another protein of this family in *Nostoc* sp. PCC7120 is part of a fusion protein between a typical catalase-related domain and a putative lipoxygenase domain, with significant similarity to the well-investigated fusion protein of allene oxide synthase from *Plexaura homomalla* and related corals (Oldham *et al.*, 2005).

The physiological role of the typical catalase in *N. punctiforme* is unknown. From the published kinetic parameters of this protein family [ $k_{\text{cat}}$  within 54 000–833 000 s<sup>-1</sup>,

$K_M$  within 38–600 mM and activities that are essentially pH independent from pH 5 to pH 10) (Chelikani *et al.*, 2003)], it is reasonable to assume that it has a protective role against environmental H<sub>2</sub>O<sub>2</sub> generated in the ecosystem similar to the proposed role of bifunctional KatGs (see below).

*Bifunctional catalase–peroxidase:* In contrast to typical catalases, ~30% of all known cyanobacterial genomes contain one gene (*katG*) encoding a bifunctional KatG. KatG represents the only peroxidase of both haem peroxidase superfamilies with a reasonable high catalase activity (Reaction 3), besides a usual peroxidase activity (Reaction 1). Together with ascorbate peroxidases, present in chloroplastic organisms, and cytochrome *c* peroxidase, found mainly in mitochondrial organisms, KatGs constitute class I of the plant, fungal, protist, and bacterial haem peroxidase superfamily (Welinder, 1992; Passardi *et al.*, 2007). The predominant form of haem *b*-containing KatGs in solution is a dimer or tetramer (Welinder, 1992; Chelikani *et al.*, 2004), and each subunit is composed of two distinct sequence-related N- and C-terminal domains, which led to the proposal that the large gene size of KatG had arisen through a gene duplication and fusion event of a primordial peroxidase gene after which the C-terminal domain likely lost its functionality (Welinder, 1991).

The evolution of KatGs was analysed recently (Passardi *et al.*, 2007). The most important output of this investigation is that *katG* genes are distributed in ~40% of bacterial genomes, and sometimes even closely related species differ in possessing *katG* genes of different origin or even do not possess any *katG* genes. It has to be mentioned that KatGs are also found in eukaryotes, including some algae, protists, and fungi. Phylogenetic analysis (Fig. 1) reveals the presence of a distinct and well-segregated clade of cyanobacterial KatGs, suggesting early segregation in evolution. In addition, at least two independent lateral gene transfers occurred during the evolution of this protein family between various bacterial taxa and ancestors of (i) a group formed by *S. elongatus* PCC6301, *Synechococcus* PCC7002, and *Synechocystis* PCC6803; (ii) *Gloeobacter violaceus*; and (iii) most probably *Acaryochloris marina* (Fig. 1). *Cyanothece* sp. CCY0110 is the only diazotrophic cyanobacterium with a *katG* gene; all other species that contain this haem protein are unable to fix nitrogen (Table 2). No paralogues are found within one cyanobacterial species.

The four available crystal structures of the KatGs, i.e. those for *Haloarcula marismortui* (1ITK) (Yamada *et al.*, 2002), *Burkholderia pseudomallei* (1MWV) (Carpena *et al.*, 2003), *Mycobacterium tuberculosis* (1SJ2) (Bertrand *et al.*, 2004), and of the cyanobacterium *Synechococcus* PCC7942 (1UB2) (Wada *et al.*, 2002), revealed that KatGs have proximal and distal conserved amino acids at almost identical positions to those in other class I peroxidases (Smulevich *et al.*, 2006). In particular, both the triads histidine/tryptophan/aspartate (His259, Trp341, and Asp402; *Synechocystis* PCC6803 numbering) and histidine/arginine/tryptophan (His123, Arg119, and Trp122) are conserved (Figs 2, 3A). Moreover, the distal histidine is

**Table 2.** ORFs and genes of cyanobacterial catalases and peroxidases in 44 completely or partially (\*) sequenced strains (including genome size)

Nitrogen-fixing cyanobacteria are shaded in light grey, and heterocyst-forming species in dark grey. Classification of cyanobacteria: I, Pleurocapsales; II, Chroococcales; III, Oscillatoriales; IV, Nostocales; V, unclassified. The percentage quantifies differences within the species of the *Prochlorococcus* and the *Synechococcus* group.

| Cyanobacteria                                       | Genome size (Mb) | Catalases                      |                               |                                | Peroxidases                        |                   |                     |               |           |               |                |                                           |                                 |
|-----------------------------------------------------|------------------|--------------------------------|-------------------------------|--------------------------------|------------------------------------|-------------------|---------------------|---------------|-----------|---------------|----------------|-------------------------------------------|---------------------------------|
|                                                     |                  | (Monofunctional) haem catalase | (Class 1) Catalase–peroxidase | (Binuclear) manganese catalase | Peroxi-dockerin-related peroxidase | Dihaem peroxidase | Vanadium peroxidase | Peroxiredoxin |           |               |                | Glutathione peroxidase-related peroxidase |                                 |
|                                                     |                  |                                |                               |                                |                                    |                   |                     | 1-cys Prx     | 2-cys Prx | Type II Prx   | PrxQ           |                                           |                                 |
| 12× <i>Prochlorococcus marinus</i> <sup>a</sup> (I) | 1.6–2.7          |                                |                               |                                |                                    |                   |                     |               | 1         | 15% 1         | 85% 2          | 1                                         |                                 |
| <i>Gloeobacter violaceus</i> PCC7421 (II)           | 4.6              |                                | 1                             | 1                              |                                    |                   |                     |               |           | 85% 0         | 15% 1          |                                           |                                 |
| <i>Microcystis aeruginosa</i> NIES-843 (II)         | 5.8              |                                |                               |                                |                                    |                   |                     | 1             | 1         | 1             | 3              | 1                                         |                                 |
| <i>Synechococcus elongatus</i> PCC6301 (II)         | 2.7              |                                | 1                             |                                |                                    |                   |                     | 1             | 1         |               | 4              | 1                                         |                                 |
| <i>Synechococcus elongatus</i> PCC7942 (II)         | 2.7              | 1 <sup>c</sup>                 | 1                             |                                |                                    |                   |                     | 1             | 1         |               | 4              | 1                                         |                                 |
| 14× <i>Synechococcus sp.</i> <sup>b</sup> (II)      | 2.2–3.0          |                                | 60% 1<br>40% 0                |                                |                                    |                   |                     |               |           | 5% 1<br>95% 0 | 40% 1<br>60% 0 | 15% 1<br>85% 0                            | 5% 4<br>45% 3<br>45% 2<br>15% 0 |
| <i>Synechocystis sp.</i> PCC 6803 (II)              | 3.6              |                                | 1                             |                                |                                    |                   |                     | 1             | 1         | 1             | 2              | 2                                         |                                 |
| <i>Thermosynechococcus el.</i> BP-1 (II)            | 2.6              |                                |                               |                                |                                    |                   |                     | 1             | 1         |               | 3              |                                           |                                 |
| <i>Acaryochloris marina</i> (V)                     | 6.5              |                                | 1                             |                                | 1                                  | (2?)              | 2 (1)               | 2             | 1         | 1             | 4              |                                           |                                 |
| <i>Crocospaera watsonii</i> WH8501* (II)            | 6.2              |                                |                               |                                | 1                                  |                   | 1                   | 1             | 1         | 1             | 2              | 1                                         |                                 |
| <i>Cyanothece sp.</i> ATCC51142* (II)               | 4.9              | 1 <sup>c</sup>                 |                               |                                | 1                                  |                   | (1)                 | 1             | 1         | 1             | 2              |                                           |                                 |
| <i>Cyanothece sp.</i> CCY0110* (II)                 | 5.9              |                                | 1                             | 1                              | 1                                  |                   |                     | 1             | 1         | 1             | 3              |                                           |                                 |
| <i>Cyanothece sp.</i> PCC7424* (II)                 | 5.9              |                                |                               | 3                              |                                    |                   |                     | 1             | 1         | 1             | 4              |                                           |                                 |
| <i>Cyanothece sp.</i> PCC8801* (II)                 | 5.9              |                                |                               |                                |                                    |                   |                     | 1             | 1         | 1             | 3              | 1                                         |                                 |
| <i>Lyngbya sp.</i> PCC8106*(III)                    | 7.0              |                                |                               | 1                              | 1                                  |                   |                     | 1             | 1         | 1             | 3              |                                           |                                 |
| <i>Trichodesmium erythraeum</i> IMS101 (III)        | 7.7              |                                |                               |                                |                                    |                   |                     | 1             | 1         | 1             | 3              |                                           |                                 |
| <i>Anabaena variabilis</i> ATCC29413 (IV)           | 6.3              |                                |                               | 1                              |                                    | (1?)              |                     | 1             | 1         | 1             | 4              |                                           |                                 |
| <i>Nodularia spumigena</i> CCY9414* (IV)            | 5.3              |                                |                               | 1                              |                                    |                   | 1                   | 1             | 1         | 1             | 4              |                                           |                                 |
| <i>Nostoc punctiforme</i> PCC73102* (IV)            | 9.0              | 1                              |                               | 2                              |                                    |                   |                     | 1             | 1         | 1             | 4              | 1                                         |                                 |
| <i>Nostoc (Anabaena) sp.</i> PCC7120 (IV)           | 6.4              | 1 <sup>c</sup>                 |                               | 2                              |                                    |                   |                     | 1             | 1         | 1             | 4              |                                           |                                 |

<sup>a</sup> The *Prochlorococcus marinus* genus includes the following strains: Pro9601, Pro9211, Pro9215, Pro9301, Pro9303, Pro9312, Pro9313, Pro9515, ProNATL1A, ProNATL2A, Pro1375, and Pro1986.

<sup>b</sup> The following strains are included in the *Synechococcus* group: Syn107\*, Syn9311, Syn9605, Syn9902, SynJA23, SynJA33, Syn7002, Syn307, Syn9916\*, Syn9917\*, Syn5701\*, Syn7803, and Syn7805\*.

<sup>c</sup> Pseudo-gene (incomplete or fusion gene).

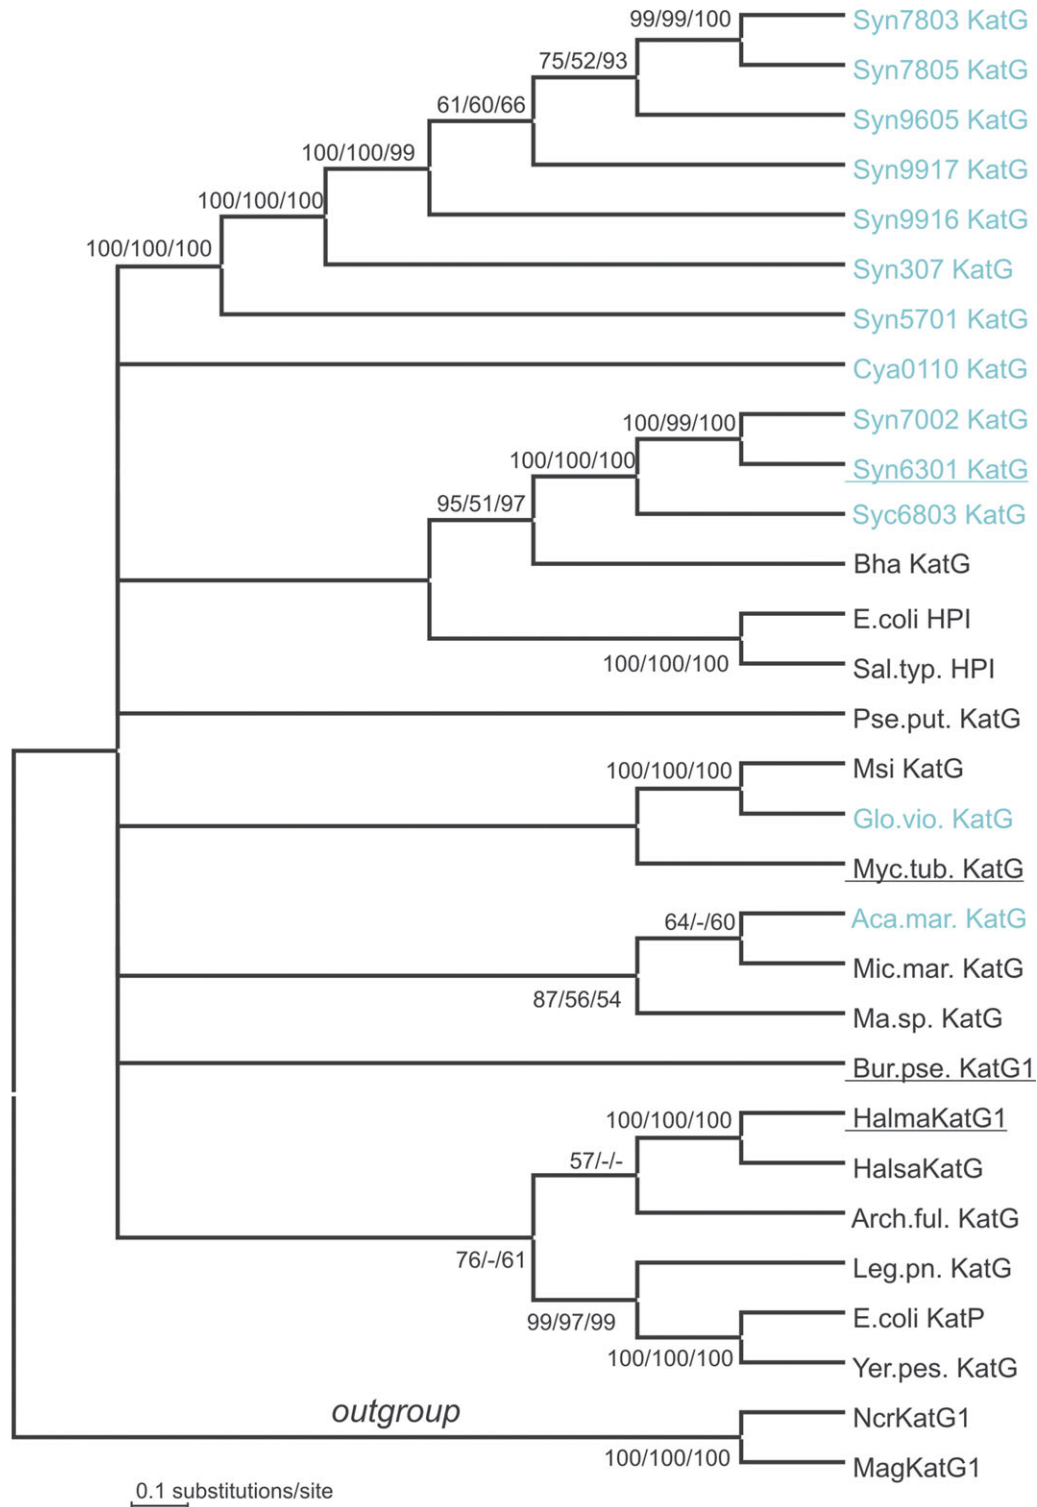

**Fig. 1.** Reconstructed phylogenetic tree of 30 catalase–peroxidases (KatGs) rooted with an outgroup (i.e. fungal KatGs). Presented is the tree obtained by the MEGA4 package (Tamura *et al.*, 2007). The Neighbor–Joining method was applied with 1000 bootstrap replications and the Jones–Taylor–Thornton model of amino acid substitutions. Further, complete deletion of gaps, a homogenous pattern among lineages, and uniform rates among sites were used. Nearly identical trees were also obtained with the maximum parsimony method (within the MEGA4 package, 1000 bootstraps) and with the maximum likelihood method (from Phylip package 3.68 <http://evolution.gs.washington.edu/phylip.html> 100 bootstraps). The reconstructed consensus tree is presented using the Tree Explorer included in the MEGA package. Numbers on the branches represent bootstrap values as obtained from NJ/MP/ML, respectively (only values >50% are presented; lower values are denoted '-'). Cyanobacterial KatGs are highlighted in cyan. For abbreviations, gene assignments, and accession numbers of cyanobacterial KatGs, see Table 1. Sequences with known 3D structures are underlined. The scale bar indicates the frequency of substitutions per site.



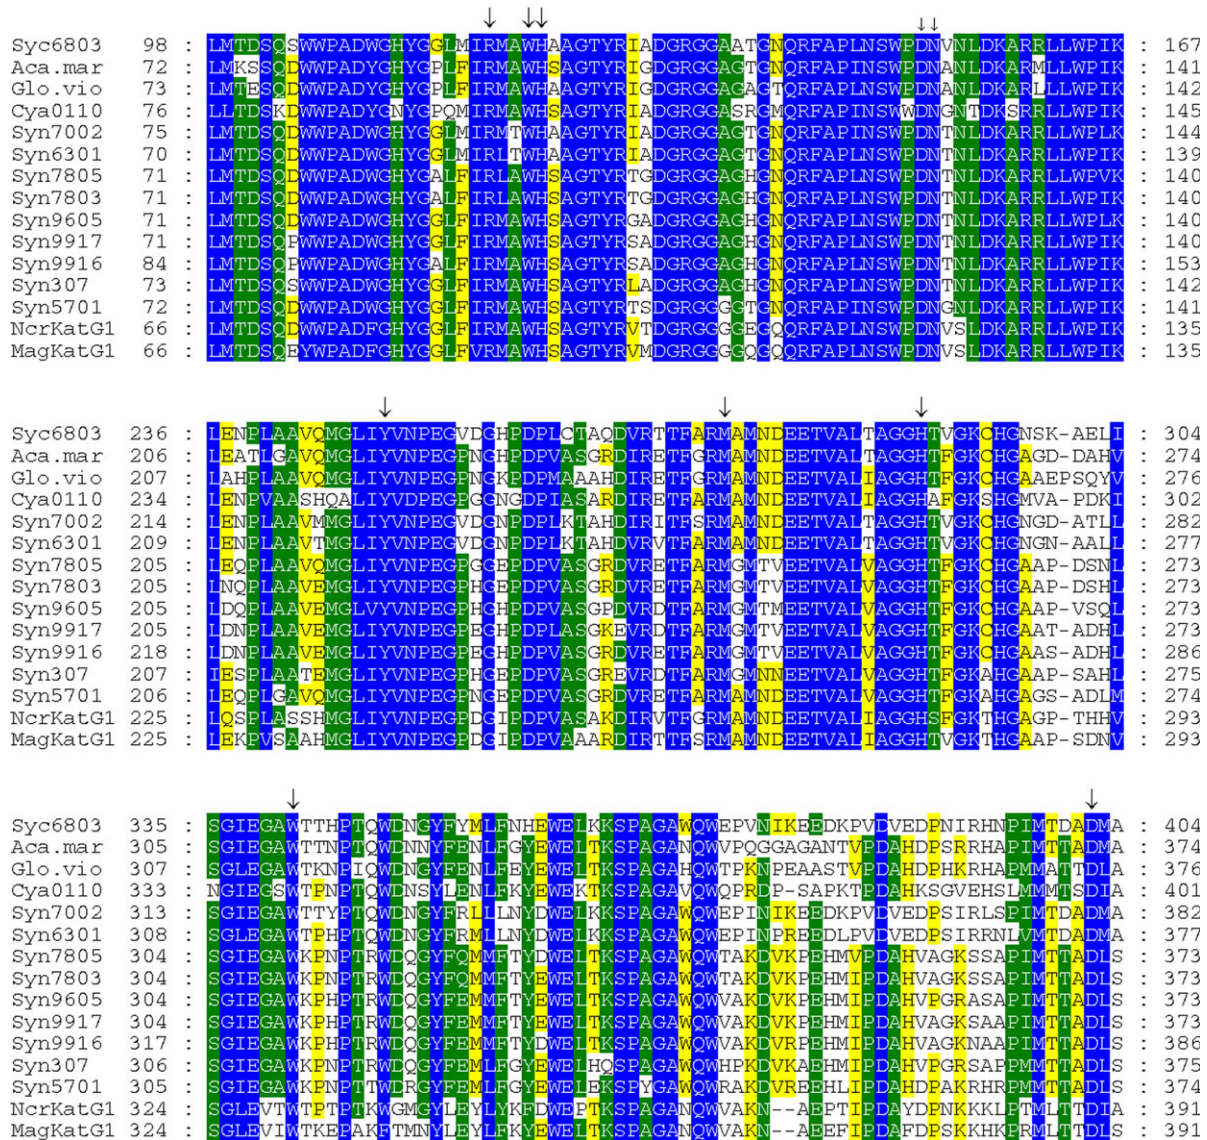

**Fig. 2.** Selected parts of the multiple sequence alignment of all cyanobacterial catalase–peroxidases (KatGs) sequenced so far. Amino acid sequences were extracted from the NCBI protein database. For sequence similarity searches, PHI and PSI Blast were used (<http://www.ncbi.nlm.nih.gov/BLAST/>). Multiple protein sequence alignments were performed by applying two different alignment programs, namely ClustalX, version 1.81, (<http://bips.u-strasbg.fr/fr/Documentation/ClustalX/>) (Jeanmougin *et al.*, 1998) with the following parameters: gap opening 10.0, gap extension 0.20, and the gonnet protein weight matrices; and Kalign, version 2 (<http://msa.cgb.ki.se/cgi-bin/msa.cgi>) with gap opening 11.0, gap extension 0.85 and terminal gap 0.45 were set as parameters (Lassmann *et al.*, 2005). Colour scheme: the highest similarity is presented on a blue background, high similarity on green, and low similarity on a yellow background. For abbreviations, gene assignments, and accession numbers of cyanobacterial species see Table 1. Arrows indicate essential active site residues.

hydrogen-bonded to a conserved asparagine (Asn153) and the proximal histidine is hydrogen-bonded to the carboxylate side chain of the nearby aspartate residue which, in turn, is hydrogen-bonded to the nitrogen atom of the indole group of the nearby tryptophan residue (Fig. 3A). However, the X-ray structures also revealed features unique to KatG. In the vicinity of the active site, novel covalent bonds are formed among the side chains of three distal residues including the conserved Trp122 (Fig. 3A). In particular, both X-ray crystallization data (Yamada *et al.*, 2002; Carpena *et al.*, 2003; Bertrand *et al.*, 2004) and mass spectrometric analysis

(Donald *et al.*, 2003; Jakopitsch *et al.*, 2003) have confirmed the existence of a covalent adduct between Trp122, Tyr249, and Met275. Sequence alignment suggests that all these structural features are fully conserved in cyanobacterial KatGs (Fig. 2).

Other KatG-typical features also are found in cyanobacterial proteins are three large loops, two of them showing highly conserved sequence patterns (Zamocky *et al.*, 2001) and constricting the access channel of H<sub>2</sub>O<sub>2</sub> to the prosthetic haem *b* group at the distal side. The channel is characterized by a pronounced funnel shape and a continuum of water

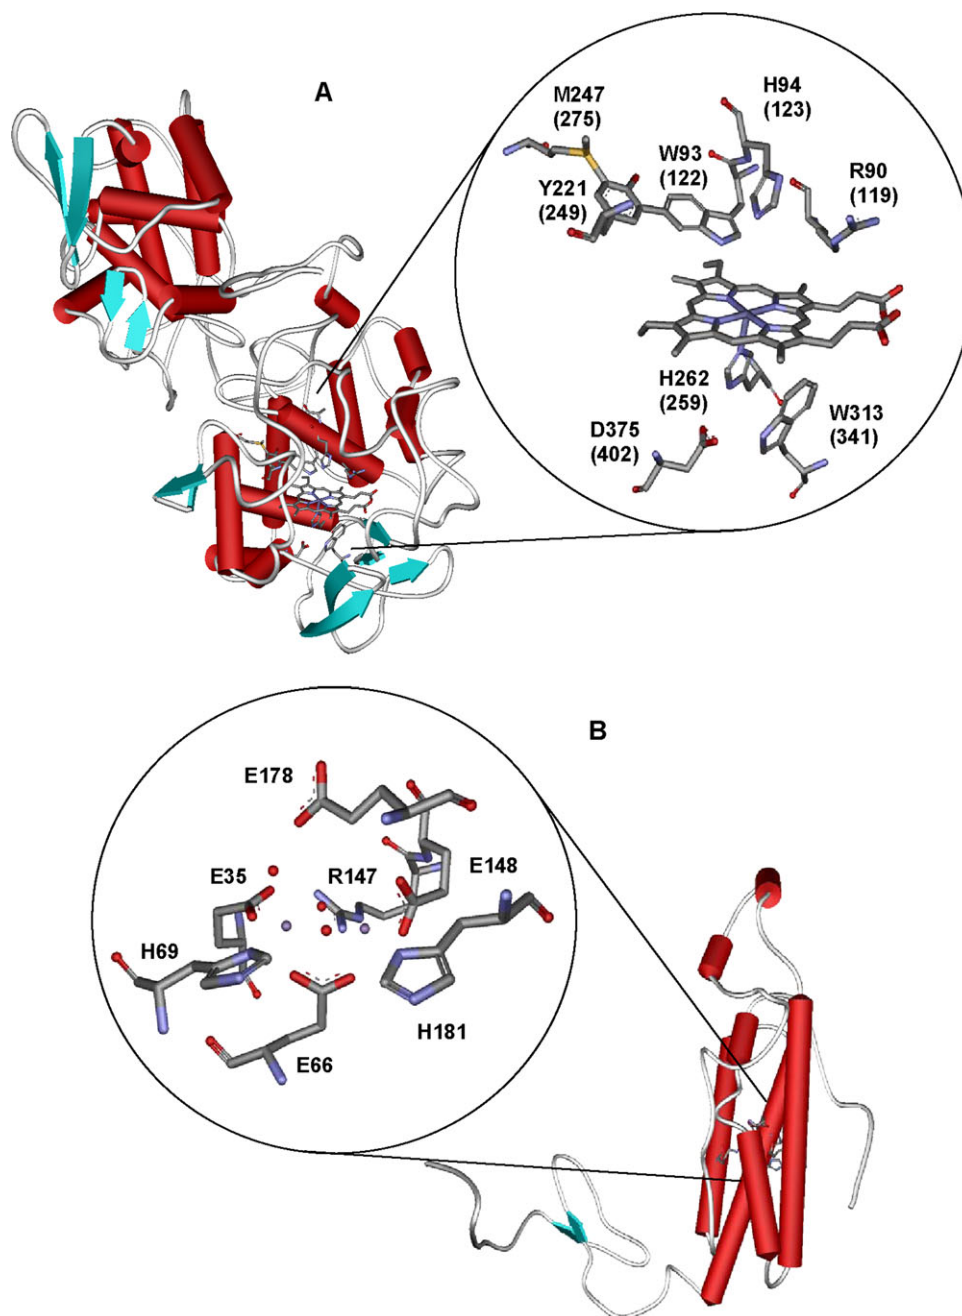

**Fig. 3.** (A) KatG monomer and assignment of secondary structure elements as well as the active site of dimeric catalase–peroxidase from the cyanobacterium *Synechococcus* PCC7942 (accession code 1UB2) (Wada *et al.*, 2002) (*Synechocystis* numbering in parentheses). Each subunit is composed of two distinct sequence-related N- and C-terminal domains. Only the N-terminal domain contains haem *b*. Active site residues include the proximal triad His–Trp–Asp and the distal triad His–Arg–Trp, as well as the unique covalent adduct Trp–Tyr–Met. (B) Monomeric structure and view of the dinuclear manganese complex at the active site of dimeric manganese catalase from *Lactobacillus plantarum* (accession code 1JKU) (Barynin *et al.*, 2001). In the monomeric structure, all secondary structure elements and the prosthetic group are assigned. In the active site structure, all coordinating ligands are depicted. Manganese ions are represented by violet spheres, and coordinated solvent is represented in red spheres. The figures were built using SWISS-PDB Viewer ([www.expasy.ch/spdbv](http://www.expasy.ch/spdbv)).

molecules. At the narrowest part of the channel, which is similar but longer and more restricted than that in typical (monofunctional) peroxidases, two highly conserved residues, namely Asp152 and Ser335, control the access to the distal haem side. Together with a conserved glutamate residue at the entrance, both acidic residues seem to be

critical for stabilizing the solute matrix and orienting the water dipoles in the channel. Exchange of both residues affects the catalase but not the peroxidase activity (Jakopitsch *et al.*, 2005).

This extensive distal site hydrogen-bonding network causes KatGs to differ from typical peroxidases. Typically, the



catalase but not the peroxidatic activity is very sensitive to mutations that disrupt this network (Heering *et al.*, 2002; Jakopitsch *et al.*, 2004). Moreover, the integrity of this network is crucial for the formation of distinct protein radicals that are formed upon incubation of KatG with peroxides (Ivancich *et al.*, 2003). Mutational analysis clearly underlined the importance of the KatG-typical covalent adduct tryptophan–tyrosine–methionine for H<sub>2</sub>O<sub>2</sub> dismutation. Its disruption significantly decreased the catalase but not the peroxidase activity. Similarly, all other mutations so far performed in the haem cavity or substrate channel of a KatG affected the oxidation but not the reduction reaction of H<sub>2</sub>O<sub>2</sub> (Smulevich *et al.*, 2006), which is the initial reaction in all haem catalases and peroxidases.

Dismutation of H<sub>2</sub>O<sub>2</sub> according to Reaction 3 follows a two-step mechanism. Heterolytic cleavage of H<sub>2</sub>O<sub>2</sub> (i.e. compound I formation) follows Reaction 4. It is important to note that the exact electronic structure of formed compound I, that actually oxidizes the second H<sub>2</sub>O<sub>2</sub> according to Reaction 5 (i.e. compound I reduction), is still speculative (Jakopitsch *et al.*, 2007). Conventional compound I is a oxoiron(IV) porphyrin  $\pi$ -cation radical species [<sup>+</sup>Por Fe(IV)=O] that in KatG could be in equilibrium with an alternative (H<sub>2</sub>O<sub>2</sub>-oxidizing?) compound I [<sup>+</sup>AA Por Fe(IV)=O], with AA being a so far not localized amino acid radical (Jakopitsch *et al.*, 2007). One role of the KatG-specific tryptophan–tyrosine–methionine adduct might be to provide the (at least transient) radical site [<sup>+</sup>MYW Fe(IV)=O] that quenches the porphyrin radical according to Reaction 4 and participates in H<sub>2</sub>O<sub>2</sub> oxidation (Reaction 5). Similar to typical peroxidases, compound I formation is clearly assisted by the conserved distal residues His123 and Arg119 (Smulevich *et al.*, 2006), but the exact role of specific distal amino acids in H<sub>2</sub>O<sub>2</sub> oxidation is still speculative.

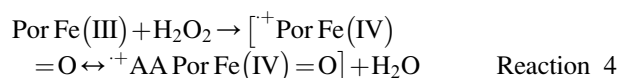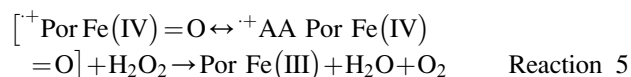

Both  $k_{\text{cat}}$  and  $K_{\text{M}}$  values of KatGs are significantly lower compared with typical catalases. Apparent values range from 3500 s<sup>-1</sup> to 7500 s<sup>-1</sup> and from 3.7 mM to 8 mM (Smulevich *et al.*, 2006), respectively, and the two so far kinetically investigated cyanobacterial representatives fall within this range (Mutsuda *et al.*, 1996; Jakopitsch *et al.*, 1999). In contrast to typical catalases and MnCats, the catalase activity of KatG has a sharp maximum activity at ~pH 6.5.

KatG is a bifunctional enzyme. It oxidizes typical artificial peroxidase substrates such as *o*-dianisidine, guaiacol, or ABTS [2,2'-azino-bis(3-ethylbenzthiazoline-6-sulphonic acid)]. The pH profile of the peroxidase activity of KatG has a maximum within pH 5–6 depending on the nature of the one-electron donor. Additionally, KatGs have been reported also to have halogenation (Jakopitsch *et al.*, 2001) and NADH oxidase (Singh *et al.*, 2004) activity.

The naturally occurring peroxidase substrate is unknown. In physiological conditions, it is well known that KatG from *Mycobacterium tuberculosis* can activate the anti-tuberculosis drug isoniazid (Zhao *et al.*, 2006). Due to the restricted access, only small peroxidase substrates can enter the main entrance channel. A second access route, found in monofunctional peroxidases, approximately in the plane of the haem, is blocked by the KatG-typical loops. However, another potential route that provides access to the core of the protein, between the two domains of the subunit, has been described (Carpena *et al.*, 2003). It has been speculated that this could be the binding site for substrates with extended, possibly even polymeric, character. In any case, neither the naturally occurring one-electron donor(s) nor the function of a high peroxidase activity in an enzyme with catalase activity is known either in prokaryotic or in eukaryotic KatGs. A reasonable role at low peroxide concentration could be the reduction of inactive compound II species to ferric KatG.

It has been proposed that KatG in *Synechocystis* PCC6803 has a protective role against environmental H<sub>2</sub>O<sub>2</sub> generated in the ecosystem and that this protective role is most apparent at a high cell density of the cyanobacterium (Tichy and Vermaas, 1999). Deletion of the *katG* gene in *Synechocystis* PCC6803 resulted in a mutant strain with normal phenotype and resistance to H<sub>2</sub>O<sub>2</sub> and methyl viologen indistinguishable from those of the wild type. Nevertheless the rate of H<sub>2</sub>O<sub>2</sub> decomposition in the  $\Delta$ *katG* mutant was ~30 times lower than in the wild type (Tichy and Vermaas, 1999). Apparently the residual H<sub>2</sub>O<sub>2</sub>-scavenging capacity was more than sufficient to deal with the rate of H<sub>2</sub>O<sub>2</sub> production by the cell. In the  $\Delta$ *katG* mutant, H<sub>2</sub>O<sub>2</sub> degradation was light dependent and could be stimulated by addition of a thiol such as dithiothreitol. The authors concluded that this activity might derive from a thiol-specific peroxidase, for which thioredoxin is the physiological electron donor. This has been underlined by a bioinformatic analysis of the genome of *Synechocystis* PCC6803 (Stork *et al.*, 2005) that revealed the presence of five ORFs with similarity to Prxs (see below and also Table 2).

Similarly, investigation of *Synechococcus* sp. PCC7942 (Miller *et al.*, 2000; Perelman *et al.*, 2003) has also demonstrated the existence of two classes of H<sub>2</sub>O<sub>2</sub>-degrading enzymes, namely a (cytosolic) KatG, that is essential for survival and elimination of relatively high concentrations of externally added H<sub>2</sub>O<sub>2</sub>, and light-dependent peroxidase(s) that are essential during excessive radiation (see also Table 2). Despite addition of <sup>18</sup>O-labelled H<sub>2</sub>O<sub>2</sub> in the light, only <sup>16</sup>O<sub>2</sub> production was observed, indicative of H<sub>2</sub><sup>16</sup>O oxidation by PSII and formation of a photoreductant. However, in the dark, added H<sub>2</sub><sup>18</sup>O<sub>2</sub> led to release of <sup>18</sup>O<sub>2</sub> that could be completely blocked by NH<sub>2</sub>OH, an inhibitor of KatG (Miller *et al.*, 2000). This also suggests a temporal difference in activity of Prxs and KatG.

*Manganese catalase*: MnCats (non-haem or di-manganese catalases; EC 1.11.1.6) represent only a minor gene family with catalase activity that is also found in cyanobacteria.

With the exception of *G. violaceus* PCC7421, only diazotrophic species contain at least one ORF with similarity to MnCat. Two paralogues are found in heterocyst-forming *N. punctiforme* (that also contains a typical catalase) and *Nostoc* PCC7120 (Table 2), and three paralogues exist in the genome of *Cyanothece* sp. PCC7424. Interestingly, with the exception of *G. violaceus* and *Cyanothece* sp. CCY0110, cyanobacteria contain either a *katG* gene or gene(s) encoding MnCat(s), and ~50% of the investigated species contain neither a typical catalase, nor a KatG or MnCat (e.g. all *Prochlorococcus marinus* strains, *Microcystis aeruginosa*, *Synechococcus* el. BP-1 etc., compare with Table 2). Only in all genomes of heterocyst-forming diazotrophic cyanobacteria known so far was at least one gene encoding MnCat detected (Table 2).

A recently performed phylogenetic analysis of bacterial MnCats (Zamocky *et al.*, 2008a) reveals the presence of five

distinct and well segregated clades. The present analysis (Fig. 4), that includes all available cyanobacterial genes, demonstrates that cyanobacterial MnCats are found in clade 3 (with Firmicutes and proteobacteria) as well as in clade 4 (with the genus *Bacteroides*) that was separated rather early from the common ancestor. It is interesting to note that some authors argued for a role for di-manganese catalase in still anoxygenic (cyano?)bacteria as a forerunner of Mn-containing PSII (McKay and Hartman, 1991; Lane, 2002). It was noted that the active site structure of MnCat reveals similarity to the tetranuclear manganese complex of the oxygen-evolving centre of PSII (Blankenship *et al.*, 1998).

So far, neither an expression study nor a functional or structural analysis of a cyanobacterial MnCat is found in literature. However, multiple sequence alignment (Fig. 5) reveals a rather high identity mainly in the active site residues with two enzymes of known crystal structure,

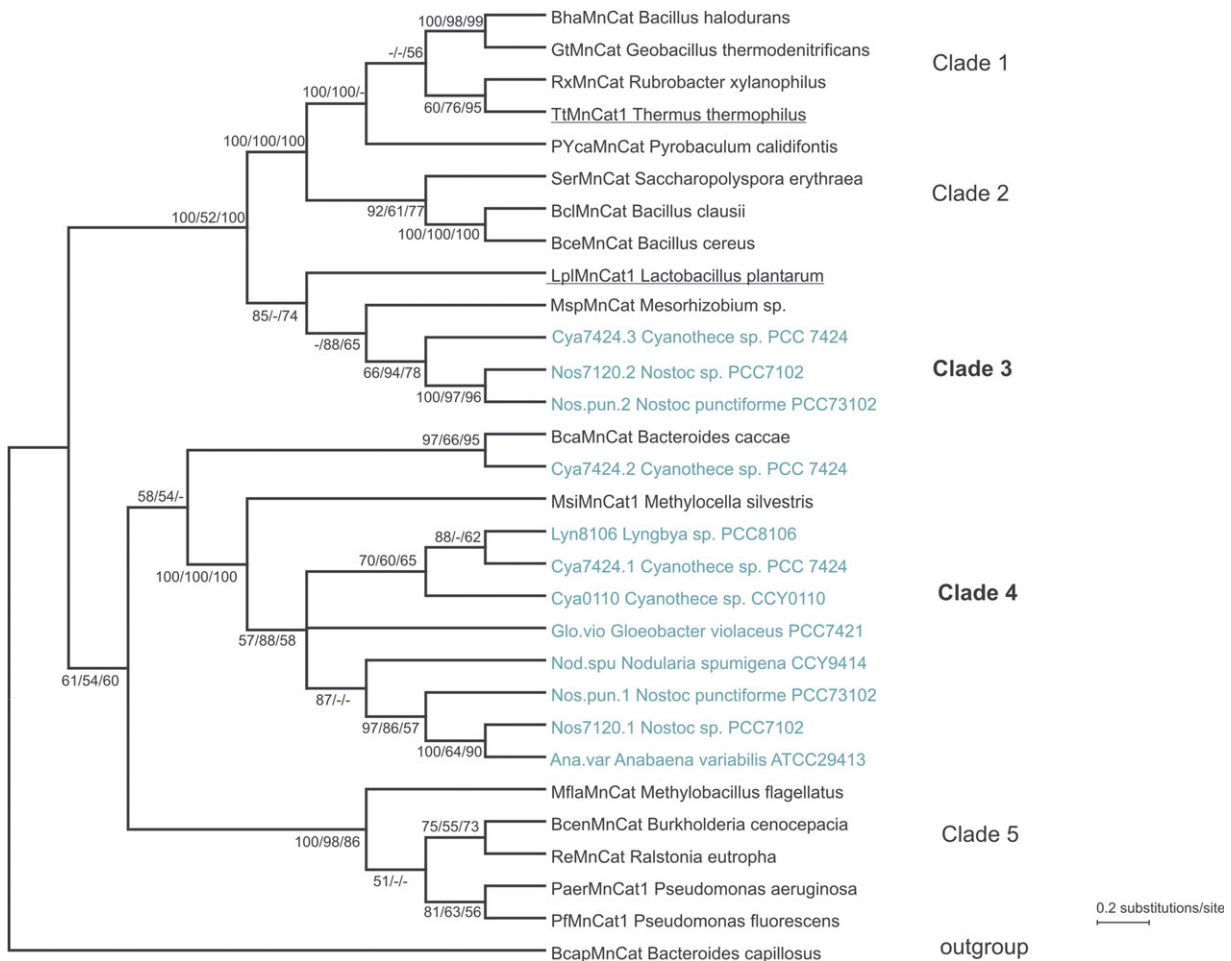

**Fig. 4.** Reconstructed phylogenetic tree of 30 manganese catalases rooted with an outgroup. Presented is the tree obtained with the MEGA4 package (Tamura *et al.*, 2007). The Neighbor–Joining method was applied with 1000 bootstrap replications and the Jones–Taylor–Thornton model of amino acid substitution. Very similar trees were also obtained with the maximum parsimony method (within the MEGA4 package, 1000 bootstraps) and with the maximum likelihood method (from Phylip package 3.68 <http://evolution.gs.washington.edu/phylip.html> using 100 bootstraps). Numbers on the branches represent bootstrap values as obtained from NJ/MP/ML, respectively (only values >50% are presented, lower values are denoted ‘-’). Cyanobacterial manganese catalases are highlighted in cyan. For abbreviations, gene assignments, and accession numbers of cyanobacterial sequences, see Table 1. Sequences with known 3D structures [*Thermus thermophilus* (TtMnCat1) and *Lactobacillus plantarum* (LplMnCat1)] are underlined. The scale bar indicates the frequency of substitutions per site.

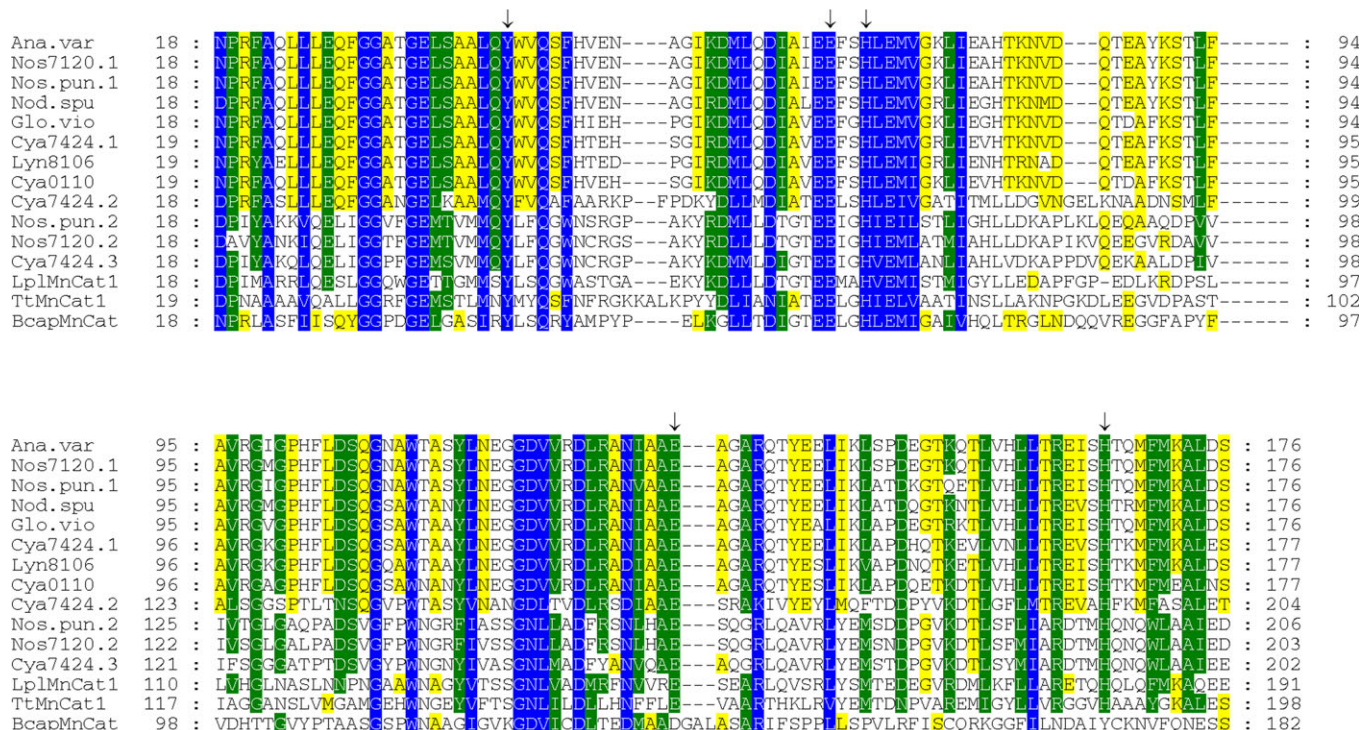

**Fig. 5.** Selected parts of the multiple sequence alignment of all cyanobacterial manganese catalases sequenced so far including manganese catalases of known crystal structure [*Thermus thermophilus* (TtMnCat1) and *Lactobacillus plantarum* (LpMnCat1)]. Colour scheme: the highest similarity is presented on a blue background, high similarity on green, and a low similarity on a yellow background. Arrows indicate conserved residues involved in ligation of the binuclear manganese centre as well as an essential outer sphere tyrosine that is important in maintenance of an intact hydrogen-bonding network. For abbreviations, gene assignments, and accession numbers of cyanobacterial strains, see Table 1.

namely the MnCats from *Thermus thermophilus* (Antonyuk *et al.*, 2000) and *Lactobacillus plantarum* (Barynin *et al.*, 2001). These proteins contain six identical subunits (~30 kDa) each with a bridged binuclear Mn centre located within a conserved closely packed four-helix bundle domain (Fig. 3B). The ligands for the di-manganese centre are almost invariantly conserved among all known sequences (Fig. 3B). A bridging glutamate (Glu66 in *L. plantarum* numbering) anchors the two ions in the binuclear cluster. Each Mn ion is further coordinated by one histidine (His69 to Mn1 and His181 to Mn2) and one glutamate (Glu35 to Mn1 and Glu148 to Mn2) bound to opposite faces of the cluster (Whittaker *et al.*, 2003) (Fig. 3B). These essential ligands are highly conserved, forming typical signatures of MnCat sequence (Fig. 5), whereas the environments of these ligands differ slightly. The manganese core is completed by two solvent-derived oxygen atom bridges.

Access to the binuclear centre is via a central channel that extends the full width of the hexamer, with branches into each subunit. Each di-manganese centre is embedded in a network of hydrogen bonds that radiate from the metal centre towards the outer sphere environment. The length (~15 Å) and narrowness of these channels provide a restricted access to the only substrate, H<sub>2</sub>O<sub>2</sub>. Mutational analysis of an essential outer sphere tyrosine (Tyr42), which is conserved in all sequences so far available, clearly demonstrated the importance of an intact hydrogen-bonding

network also in MnCats (Whittaker *et al.*, 2003). In the variant Tyr42Phe, a solvent bridge was broken and an 'open' form of the di-manganese cluster was generated, thereby considerably influencing the catalytic turnover, pH optimum, and interaction with H<sub>2</sub>O<sub>2</sub>.

Though following the same overall reaction (Reaction 3), the mechanism of the catalase reaction in MnCat differs significantly from that of KatGs. The di-manganese cluster is equally stable in either Mn<sup>2+</sup>–Mn<sup>2+</sup> or Mn<sup>3+</sup>–Mn<sup>3+</sup> oxidation states. Upon isolation, the protein is frequently in a mixture of both oxidation states. Full reduction to Mn<sup>2+</sup>–Mn<sup>2+</sup> is mediated by hydroxylamine, whereas reoxidation to the homogenous Mn<sup>3+</sup>–Mn<sup>3+</sup> state can be achieved by molecular oxygen at pH >7.0 (Whittaker *et al.*, 2003). The catalase reaction can be written as a two-stage process. During catalytic turnover, the active site has to accommodate both the reduced and the oxidized state of the di-manganese core. The Mn<sup>2+</sup>–Mn<sup>2+</sup> cluster is expected to polarize the O–O bond, favouring a heterolytic cleavage of the peroxidic bond and release of water (Reaction 6) (Whittaker *et al.*, 2003). H<sub>2</sub>O<sub>2</sub> oxidation and dioxygen release occur by a simple electron transfer (Reaction 7). In principal there is no temporal order to the reduction and oxidation stages.

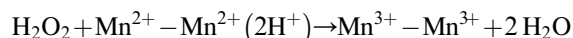

Reaction 6

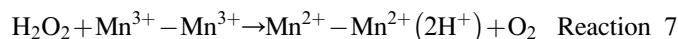

It is assumed that the change in the oxidation status is responsible for protonation or deprotonation of both bridging oxygens. Protonation is proposed for the reduced  $\text{Mn}^{2+} - \text{Mn}^{2+}$  state (see Reaction 6). In contrast to haem-containing catalases, no reactive intermediate is formed and both product waters are formed in one reaction (Reaction 6). There is no evidence for involvement of free radicals in MnCat turnover, and nothing is known about a peroxidatic reactivity of these oxidoreductases.

The  $\text{H}_2\text{O}_2$  dismutation rates are lower compared with typical catalases and KatGs, which could explain that MnCats may not have become as widespread in nature. The activity varies only slightly over the pH range pH 5–10, very similar to that of typical catalases. The apparent  $K_M$  values are reported to be  $\sim 220$  mM (Whittaker *et al.*, 2003), suggesting a low catalytic efficiency at low  $\text{H}_2\text{O}_2$  concentrations. Their exact physiological role(s) and expression pattern are more or less unknown.

### Peroxidases

Here, it is reasonable to distinguish between haem and non-haem enzymes. From the two haem peroxidase superfamilies, i.e. the superfamily of plant, fungal, protist, and (archae) bacterial peroxidases (Welinder, 1992), and the peroxidase–cyclooxygenase superfamily (Zamocky *et al.*, 2008b), two types of haem peroxidases are found. Bi-functional (class 1) KatG is the only cyanobacterial member of the first superfamily and—due to its overwhelming catalase activity—has been discussed above. Most interestingly, cyanobacterial peroxidases might be at the origin of the second (i.e. peroxidase–cyclooxygenase) superfamily since ORFs with similarity to animal peroxidases were found within the subfamily of peroxidockerins (Zamocky *et al.*, 2008). Whereas genes encoding typical catalases, KatGs, and MnCat appear to have been acquired by lateral gene transfer in cyanobacteria, there is phylogenetic evidence that proteins from the peroxidase–cyclooxygenase superfamily originate from ancient cyanobacteria (see below). Furthermore two cyanobacterial genomes show the occurrence of ORFs with similarity to putative dihaem peroxidase.

The most important group of non-haem peroxide-degrading enzymes is represented by thiol-specific peroxidases including Prxs and GPxs. All four subclasses of Prxs found in plants also occur in cyanobacteria (Table 2) (Stork *et al.*, 2005). ORFs with similarity to those of GPxs are found in the majority of the cyanobacterial genomes, but so far no GPx activity could be measured in these organisms (Tichy and Vermaas, 1999). Furthermore, few cyanobacterial genomes show the occurrence of ORFs with similarity to putative vanadium peroxidase.

*Peroxidockerin-related (primordial) peroxidase:* It was interesting to see that some cyanobacterial genomes contain genes that encode a putative protein with similarity to

mammalian peroxidases, such as lactoperoxidase (LPO) or eosinophil peroxidase (EC 1.11.1.7). So far in six cyanobacteria the corresponding ORF of this putative peroxidase is found, that—together with peroxidockerins—constitutes an old subfamily of the peroxidase–cyclooxygenase superfamily of haem peroxidases (Zamocky *et al.*, 2008b). Peroxidockerins are multidomain proteins of unknown physiological role composed of a transmembrane domain, dockerin type 1 repeats, and the catalytic peroxidase domain. The homologous cyanobacterial proteins lack the non-enzymatic domains and cluster separately within this subfamily (Zamocky *et al.*, 2008).

The sequence alignment shown in Fig. 6 (together with bovine LPO and peroxidockerins of mixed origin) clearly underlines that all catalytic residues that are known to be essential in the catalysis of mammalian peroxidases (Furtmüller *et al.*, 2006) are also found in these primordial haem peroxidases. (i) The essential motif -WGQXVDHD- with the distal histidine in the immediate neighbourhood of two aspartate residues that are involved in haem to protein linkage and  $\text{Ca}^{2+}$  binding. Moreover, this region also contains a highly conserved glutamine that is essential in halide binding (Furtmüller *et al.*, 2006). (ii) A second motif with two essential residues is -RXXE- that contains the catalytic distal arginine and a glutamate that is also involved in the second haem to protein ester bond in LPO. (iii) The proximal ligand histidine and its hydrogen-bonding partner asparagine (arrows in Fig. 6).

It is completely unknown whether these proteins are expressed in cyanobacteria. However, inspection of the sequence (Fig. 6) suggests a functionality very similar to that of the corresponding mammalian peroxidases that use small anionic substrates such as halides (bromide, iodide) and thiocyanate as substrates to fulfil their physiological role, i.e. to produce hypohalous acids and hypothiocyanate according to Reaction 2. These oxidizing and halogenating agents participate in unspecific immune defence of mammals against pathogens. It is tempting to speculate whether some cyanobacterial species have also acquired the ability to produce antimicrobial compounds, possibly providing selective advantage.

*Dihaem peroxidase and vanadium peroxidase:* Bacterial dihaem cytochrome *c* peroxidases (DiHCCPs) catalyse the two-electron reduction of  $\text{H}_2\text{O}_2$  to water according to Reaction 1 by soluble one-electron donors such as cytochrome *c* and cupredoxins (Echalier *et al.*, 2006). However, unlike their eukaryotic counterparts, they possess two haem *c* prosthetic groups, that are covalently attached to a single polypeptide chain via two cysteines (-CXXCH-), and allow reduction of  $\text{H}_2\text{O}_2$  without the need to generate (semi-stable) radicals. The two haem groups are designated (low potential, N-terminal) haem P (peroxidatic), that actually reacts with peroxides and ligands, and (high potential, C-terminal) haem E (electron transferring). In the resting (oxidized) state, haem P is coordinated by two histidine ligands and the E haem is coordinated by a histidine and a methionine (Fülöp *et al.*, 1993). Activation of the peroxidase needs reduction of haem E



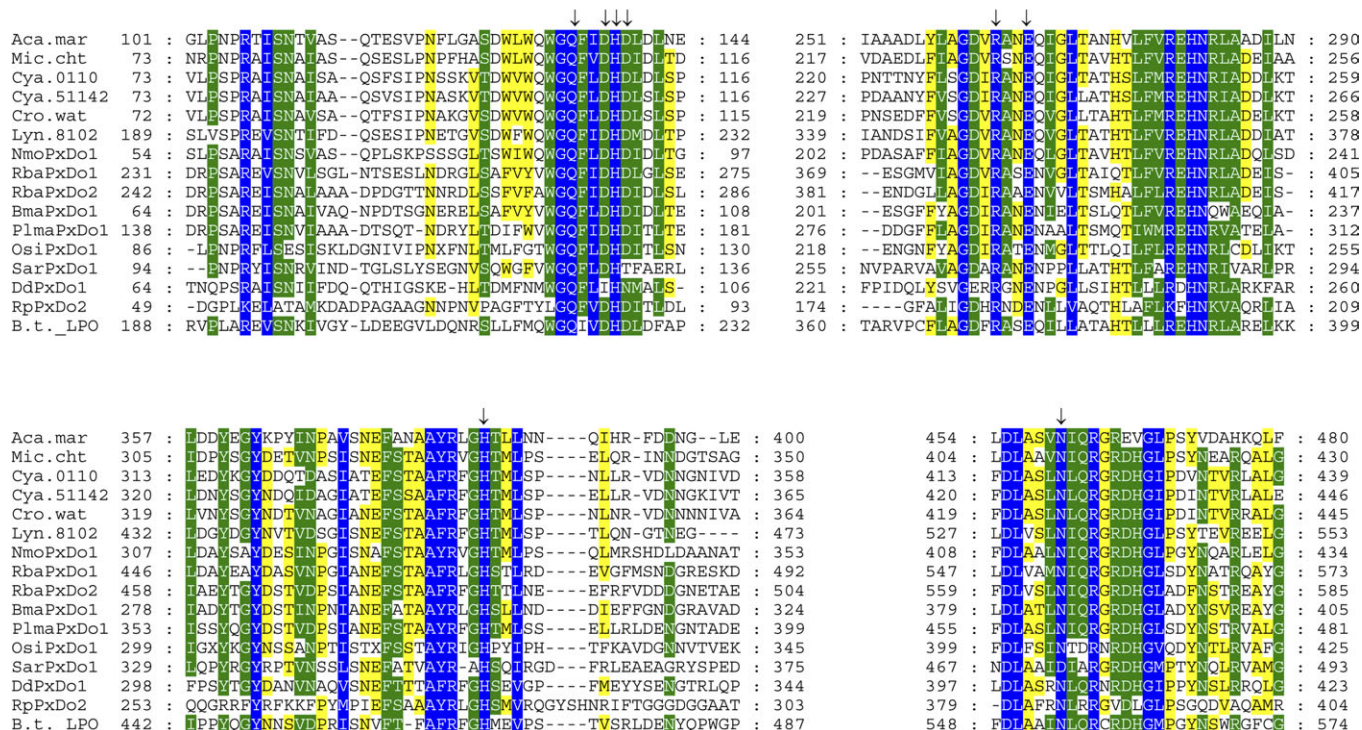

**Fig. 6.** Selected parts of the multiple sequence alignment of all cyanobacterial peroxidases sequenced so far from the peroxidase–cyclooxygenase superfamily of haem peroxidases including the sequence of bovine lactoperoxidase (LPO) and peroxidockerins (PxDos) of various origins (see Zamocky *et al.*, 2008b). Colour scheme: the highest similarity is presented on a blue background, high similarity on green, and low similarity on a yellow background. Arrows indicate conserved residues involved in haem ligation and covalent linkage as well as in catalysis as known from LPO. For abbreviations, gene assignments, and accession numbers, see Table 1.

by a small redox donor protein in order to activate haem P that includes dissociation of the coordinating distal histidine in order to allow access of the substrate(s) (Echalier *et al.*, 2006).

Three ORFs with similarity to bacterial DiHCCP were found in the genomes, one in *Anabaena variabilis* ATCC29413 and two in *A. marina* (Table 2). Analysis of the three sequences (not shown) suggests the presence of two haem *c* prosthetic groups. However, N-terminal haem P seems to lack the distal histidine, and at least in two sequences the distal coordination of haem E is unclear. Thus, the functionality of these putative proteins is not fully clear and needs further investigation. No information about (bacterial) DiHCCP-related proteins in cyanobacteria was found in the literature.

Some cyanobacterial strains in addition contain ORFs with similarity to vanadium-containing peroxidases. Vanadium-dependent enzymes are often designated as haloperoxidases (bromoperoxidase, iodoperoxidase) since they exclusively oxidize halides according to Reaction 2 and are usually found in brown and red algae, fungi, and lichen (Weyand *et al.*, 1999). They are nearly all helical homodimeric proteins that contain trigonal–bipyramidal coordinated vanadium atoms at their two active centres. The catalytically active histidine is described to be in a different environment in bromoperoxidases (**-SGH-**) and in iodoperoxidases (**-AGH-**) (Weyand *et al.*, 1999; Collin *et al.*, 2005). The present analysis demonstrates the occur-

rence of vanadium-dependent iodoperoxidases in at least five cyanobacterial species (Table 1). All essential structural motifs seem to be conserved (not shown). In addition, ORFs were found with the catalytic histidine located within the sequence **-GGH-**. Whether this has an impact on the functionality of these putative haloperoxidases is unknown (thus these proteins were set in parentheses in Table 2), as is the physiological role of vanadium peroxidases in cyanobacteria.

**Peroxiredoxins:** Prxs (EC 1.11.1.15) are a ubiquitous family of antioxidant enzymes which have been identified in all domains of life (Dietz, 2003; Wood *et al.*, 2003). *Synechocystis* PCC6803 was the first cyanobacterium where genes encoding Prxs as well as the expression of the corresponding proteins has been demonstrated (Yamamoto *et al.*, 1999; Kobayashi *et al.*, 2004; Dietz *et al.*, 2005; Hosoya-Matsuda *et al.*, 2005). A bioinformatic analysis of the genomes of *Synechocystis* PCC6803 and *S. elongatus* PCC7942 (Stork *et al.*, 2005) revealed the existence of five and six ORFs, respectively, with similarity to peroxide-detoxifying Prxs in plants.

All Prxs share the same basic catalytic mechanism composed of two steps. All Prxs appear to have the first step in common (Reaction 8), in which an activated cysteine (Cys-SH, the peroxidative cysteine) is oxidized to a sulphenic acid (Cys-SOH) by the peroxide substrate. The peroxide decomposition probably requires a base to deprotonate the



peroxidatic cysteine as well as an acid to protonate the poor RO<sup>-</sup> leaving group (Wood *et al.*, 2003). All Prxs have a conserved active site arginine, which lowers the pK<sub>a</sub> of the peroxidatic cysteine somewhat by stabilizing its thiolate form. Generally, Prxs have a rather low activity, but possess a broad substrate specificity. Possible substrates are H<sub>2</sub>O<sub>2</sub>, alkyl hydroperoxides, and peroxyxynitrite. Regarding detoxification of H<sub>2</sub>O<sub>2</sub>, it has been shown that Prxs have a K<sub>M</sub> in the low micromolar range and thus are more efficient scavengers of trace amounts of H<sub>2</sub>O<sub>2</sub> compared with enzymes with catalase activity (see above). Reductive regeneration of the oxidized catalytic thiol (Reaction 9) depends on glutathione (R'SH) or thioredoxin, glutaredoxin, cyclophilin, and tryparedoxin (Wood *et al.*, 2003; Stork *et al.*, 2005). The mechanism of Reaction 9 distinguishes the Prx subclasses.

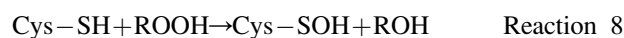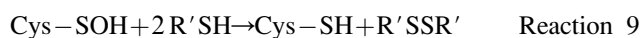

Peroxiredoxin activity can be regulated *in vivo* by cysteine oxidation, aggregation state, phosphorylation, or limited proteolysis (Wood *et al.*, 2003; Stork *et al.*, 2005; Low *et al.*, 2008). These regulatory mechanisms have, so far, mainly been investigated in eukaryotes. It is important to mention that—besides peroxide detoxification—Prxs also have a function as regulators of redox-mediated signal transduction at least in some eukaryotes (Dietz *et al.*, 2003; Veal *et al.*, 2004). Thus Prxs are important components of both the cellular antioxidant defence system and redox homeostasis.

In plants, Prx proteins are categorized into four subclasses based on subunit composition, number, and location of the conserved cysteine residues, as well as the sequence environment of the catalytic centre. They also show differences with respect to the reductant which is predominantly used. According to the work of Stork *et al.* (2005), this categorization has been used here for the analysis of all cyanobacterial genomes so far available. Table 2 demonstrates that with a few exceptions, all cyanobacteria have at least one representative Prx for each of the four subclasses.

**1-Cys peroxiredoxin.** All investigated cyanobacterial genomes contain an ORF with similarity to 1-Cys Prx (Table 2). Only *A. marina* contains two paralogues. 1-Cys Prxs contain a single conserved catalytic cysteine with the N-terminal highly conserved sequence -VLFSHPXDY-TPVCTTE-. Its catalytic cycle is not fully understood. Reduction of the oxidized peroxidatic cysteine (Reaction 9) is directly by the reductant molecule. In plants it has a dual location in the cytosol and nucleus, and is preferentially expressed in the embryo and aleurone (Stacy *et al.*, 1996). Similarly to its suggested function in plants, 1-Cys Prx in cyanobacteria may be involved in protecting nucleic acids from oxidative damage, particularly under stress. With the exception of H<sub>2</sub>O<sub>2</sub>- and methylviologen-induced oxidative stress, in *Synechocystis* PCC6803 *1-cys prx* mRNA increased in response to all kinds of metabolic imbalances, including

irradiation, salinity, and iron deficiency (Stork *et al.*, 2005). Heterologously expressed 1-Cys Prx from *Synechocystis* had only a low peroxidase activity, but disruption of the gene significantly reduced the growth rate of *Synechocystis* PCC6803 cells (Hosoya-Matsuda *et al.*, 2005).

**2-Cys peroxiredoxin.** All investigated species have one ORF with similarity to 2-Cys Prx (Table 2). Generally, 2-Cys Prxs, including the cyanobacterial enzymes, contain two conserved cysteines far away in the sequence within fully conserved motifs (N-terminal Cys, -FFYPLDFTFT-FVCPTTE-; and C-terminal 'resolving' Cys, -VCP-). 2-Cys Prxs are homodimeric enzymes where the two subunits interact in the catalytic cycle and are linked via a disulphide bond in the oxidized form. In detail, regeneration of the oxidized peroxidatic cysteine from one subunit occurs via attack of the C-terminal 'resolving' cysteine of the second subunit, to form an intersubunit disulphide bond, which is then reduced by one of several reductant molecules. In atypical Prx (see later), the peroxidatic cysteine and its resolving cysteine are in the same polypeptide, so their reaction forms an intrachain disulphide bond.

Cyanobacterial 2-Cys Prxs are very similar to the corresponding 2-Cys Prxs in plants, that are localized exclusively in the chloroplast. The plant protein has a defined function in photosynthesis. Depending on its redox-related oligomeric state, the 2-Cys Prx cycles between a thylakoid-bound and stromal state (Konig *et al.*, 2002). In addition to ascorbate peroxidase-mediated detoxification of Mehler reaction-driven H<sub>2</sub>O<sub>2</sub>, a redox signalling function of 2-Cys Prx has been proposed in the context of photosynthesis (Dietz *et al.*, 2003, 2005). Sequence comparisons of 2-Cys Prx from *Synechocystis* PCC6803 and the red alga *Porphyra*, where 2-Cys Prx is still encoded in the chloroplast genome, and the higher plant 2-Cys Prx (encoded in the nucleus) has led to the hypothesis that 2-Cys Prx originated from a former cyanobacterial endosymbiont (Baier and Dietz, 1997).

Generally, in bacteria, 2-Cys Prxs are suggested to detoxify peroxides generated at low rates (Wood *et al.*, 2003). In cyanobacteria, *2-cys prx* mRNA levels were highly responsive to any type of metabolic disturbance, i.e. light, methylviologen, H<sub>2</sub>O<sub>2</sub>, NaCl, etc. (Stork *et al.*, 2005), which contrasts with the constitutively high level of expression in photosynthesizing plant cells. In *Synechocystis* PCC6803, the essential role of 2-Cys Prx in photosynthetic adaptation has been established in a deletion mutant that showed increased stress sensitivity and a disturbed peroxide detoxification mechanism (Klughammer *et al.*, 1998; Yamamoto *et al.*, 1999). It uses thioredoxin as reductant, and thus its activity is coupled to the photosynthetic electron transport system. Moreover, from gene disruption analysis in *S. elongatus* PCC7942, it was concluded that 2-Cys Prx is also essential for growth during excessive radiation and that under such conditions the mutant strain could not compete with the wild type (Perelman *et al.*, 2003).

**Type II peroxiredoxin:** About 40% of cyanobacterial genomes contain one ORF with similarity to type II Prx

(atypical 2-Cys Prx) which can use thioredoxin and glutaredoxin as the reductant and can exist in multiple isoforms localized in plants in many subcellular compartments, including one in plastids (Horling *et al.*, 2002). Cyanobacterial type II Prxs contain a fully conserved N-terminal region with one cysteine (-LPGAFTPTCSS-); however, the second (C-terminal) cysteine is not conserved in all species. It is absent in the putative type II Prxs from all *Prochlorococcus* species, in *Microcystis aeruginosa*, *Trichodesmium erythraeum*, and all *Nostocales*. However, it has been demonstrated recently (Hong *et al.*, 2008) that all the putative type II Prxs of these mentioned species (with the exception of *Prochlorococcus* species and *T. erythraeum*) are hybrids with a fused glutaredoxin domain at the C-terminus that contains the conserved -CXXC- domain. The corresponding fusion protein from *Nostoc* PCC7120 has been expressed heterologously in *Escherichia coli* and was shown to have the highest peroxidase activity toward H<sub>2</sub>O<sub>2</sub> using glutathione as electron donor. The calculated  $k_{cat}$  and  $k_{cat}/K_M$  values for H<sub>2</sub>O<sub>2</sub> were reported to be 48 s<sup>-1</sup> and 3.3 × 10<sup>6</sup> M<sup>-1</sup> s<sup>-1</sup>, respectively (Hong *et al.*, 2008). Immunoblot analysis revealed its occurrence in both vegetative cells and heterocysts. Expression of this hybrid protein is enhanced during the late phase of vegetative and heterocyst growth (Hong *et al.*, 2008).

(Non-hybrid) *Synechocystis* type II Prx has been demonstrated to be strongly up-regulated upon treatment with methylviologen, H<sub>2</sub>O<sub>2</sub>, and, to a lesser extent, in response to light, salt, iron, and nitrogen deprivation (Kobayashi *et al.*, 2004; Li *et al.*, 2004; Stork *et al.*, 2005). Moreover, it was shown that a Fur-type transcription factor plays a regulatory role in the induction of the gene in response to oxidative stress (Kobayashi *et al.*, 2004). Genetic disruption of the gene indicated that the gene product is essential for aerobic phototrophic growth, essential in high light (Stork *et al.*, 2005).

**Peroxiredoxin Q:** Peroxiredoxin Q (PrxQ, atypical 2-Cys Prx) is found in all cyanobacteria. Interestingly, in contrast to *Arabidopsis thaliana* that has only a single gene, up to four paralogues are found in cyanobacterial genomes (Table 2). Thus, this subfamily constitutes the largest group of peroxidases in cyanobacteria. PrxQs are homologues of the *E. coli* bacterioferritin co-migrating protein and function as a monomer (Kong *et al.*, 2000). In typical eukaryotic PrxQs, two cysteines are spaced apart by only a few amino acids (-CTXXXC-), and this pattern is also followed by ~48% of cyanobacterial PrxQs, whereas the other putative proteins lack the second cysteine. For example, both putative PrxQs from *Synechocystis* PCC6803 and one (out of four) protein from *S. elongatus* PCC7942 lack this second cysteine and thus represent atypical PrxQ-type enzymes. One of the *Synechocystis* proteins was hardly expressed under any conditions tested, whereas the four PrxQs from *S. elongatus* PCC7942 genes showed a time dependency and stress-specific pattern of expression (Stork *et al.*, 2005). PrxQs of higher plants function in the context of photosynthesis. They are localized to the chloroplast (Lamkemeyer *et al.*,

2003), up-regulated upon oxidative stress (Horling *et al.*, 2003), and preferentially use thioredoxins as the most efficient electron donors (Colin *et al.*, 2004). All these data support the conclusion that the plant PrxQs function in the context of antioxidant defence and in the redox homeostasis of photosynthesis. A similar role in cyanobacterial metabolism is plausible.

**NADPH-dependent glutathione peroxidase-like proteins:** GPx (EC 1.11.1.9 and EC 1.11.1.12) is the general name for a family of multiple isozymes that also catalyse the reduction of H<sub>2</sub>O<sub>2</sub> or organic hydroperoxides to water or corresponding alcohols (Reaction 1) using reduced glutathione (GSH) as an electron donor (H<sub>2</sub>O<sub>2</sub> + 2 GSH → GSSG + 2 H<sub>2</sub>O). In plants, GPxs, that are distributed in different subcellular compartments, have often been classified as the fifth group of Prxs because they can reduce peroxide with higher efficiency (sometimes exclusively) by the thioredoxin system rather than by using GSH as a reducing agent (Tanaka *et al.*, 2005). A recently performed phylogenetic analysis demonstrates the occurrence of GPxs in cyanobacteria as well as their scattered distribution inside the group of proteobacteria (Margis *et al.*, 2008). The present analysis (Table 2) demonstrates that ~70% of all cyanobacterial genomes have an ORF with homology to plant GPxs, with *Synechocystis* PCC6803 and two *Synechococcus* species having two paralogues.

At the molecular level, plant GPxs are closely related to animal phospholipid hydroperoxide glutathione peroxidase (PHGPx), and the corresponding proteins have three widely conserved cysteine residues, which are assumed to be essential for catalysis (Margis *et al.*, 2008). In cyanobacterial putative GPxs these three cysteines are found within the following conserved surroundings (from the N- to the C-terminus): -XCG-, -PCN-, and -FCX-, respectively, with the latter being absent in the *Synechocystis* PCC6803 and *Synechococcus* PCC7002 protein. It has to be mentioned that the animal enzymes may contain selenocysteine, whereas plant proteins exclusively contain cysteine.

The two GPxs from *Synechocystis* PCC6803 were overexpressed in *E. coli* and showed no peroxide-reducing activity with glutathione, but were able to use NADPH as electron donor (Tichy and Vermaas, 1999; Gaber *et al.*, 2001). This fits with the fact that arginine and lysine residues conserved in GPxs are replaced by other amino acids and that both proteins contain an NADPH-binding domain. Only unsaturated fatty acid hydroperoxides and alkyl peroxides in combination with NADPH could be used as substrates, but not H<sub>2</sub>O<sub>2</sub>, NADH, glutathione, ascorbate, or cytochrome *c* (Gaber *et al.*, 2001). This fits with the data reported by Tichy and Vermaas (1999) demonstrating that in a *Synechocystis*  $\Delta katG$  mutant in the presence of 100  $\mu$ M mercaptosuccinate, which is a potent and specific inhibitor of GPx, no changes in the peroxidase activity with H<sub>2</sub>O<sub>2</sub> as oxidant and in the growth rate were observed.

In crude extracts of *Synechocystis*, NADPH-dependent GPx-like activity was measured using NADPH and  $\alpha$ -linolenic acid hydroperoxide as substrates. Immunoblotting showed that both *Synechocystis* proteins are constitutively

expressed. These data suggest that GPxs in cyanobacteria seem to play a role in protection of cellular membranes from oxidative damage by reducing unsaturated fatty acids with NADPH as electron donor.

## Conclusion

Prxs are the only peroxide-degrading enzymes found in all cyanobacterial genomes sequenced so far. All four classes of plant-type Prxs are found. Apparently these enzymes have acquired specific and indispensable functions in these oxygenic phototrophic organisms and are responsible for the detoxification of H<sub>2</sub>O<sub>2</sub> and alkyl peroxides usually produced by the cell under normal growth conditions. Additionally, they seem to have a role in stress adaptation. It has been demonstrated that their expression is up-regulated in response to all kinds of metabolic imbalances and that their activity is coupled to photosynthetic electron transport (photosynthetic adaptation).

The majority of cyanobacterial species also contain a putative NADPH-dependent GPx-like protein that—in addition to H<sub>2</sub>O<sub>2</sub> and alkyl peroxides—can also reduce fatty acid hydroperoxides produced in membranes during oxidative stress. Whether the other three (minor) groups of (putative) peroxidases (i.e. primordial haem peroxidase, dihaem cytochrome *c* peroxidase, and vanadium-dependent iodoperoxidase) found in some species are expressed and play a specific physiological role in metabolism is completely unknown at present.

It was interesting to see that genes for typical haem catalase are very unusual in cyanobacteria and that many species (~50%) even lack a gene also encoding alternative H<sub>2</sub>O<sub>2</sub>-dismutating enzymes. These include bifunctional KatG found primarily in non-diazotrophic species and MnCat found mainly in nitrogen-fixing organisms. As has been demonstrated at least for KatG, these H<sub>2</sub>O<sub>2</sub>-dismutating enzymes might have a protective role against higher concentrations of (environmental) H<sub>2</sub>O<sub>2</sub> and/or when the light-dependent peroxidases have reduced activity due to limited availability of electron donor(s).

## Acknowledgements

This work was supported by the Austrian Science Foundation FWF (project number P17928).

## References

- Antonyuk SV, Melik-Adamyam VR, Popov AN, Lamzin VS, Hempstead PD, Harrison PM, Artymiuk PJ, Barynin VV.** 2000. Three-dimensional structure of the enzyme dimanganese catalase from *Thermus thermophilus* at 1 Å resolution. *Crystallography Reports* **45**, 105–110.
- Baier M, Dietz KJ.** 1997. The plant 2-Cys peroxiredoxin BAS1 is a nuclear-encoded chloroplast protein: its expression regulation, phylogenetic origin, and implications for its specific physiological function in plants. *The Plant Journal* **12**, 179–190.
- Barghoorn ES.** 1971. The oldest fossils. *Scientific American* **224**, 30–42.
- Barynin VV, Whittaker MM, Antonyuk SV, Lamzin VS, Harrison PM, Artymiuk PJ, Whittaker JW.** 2001. Crystal structure of manganese catalase from *Lactobacillus plantarum*. *Structure* **9**, 725–738.
- Bertrand T, Eady NAJ, Jones JN, Jesmin JM, Nagy JM, Jamart-Gregoire B, Raven EL, Brown KA.** 2004. Crystal structure of *Mycobacterium tuberculosis* catalase-peroxidase. *Journal of Biological Chemistry* **279**, 38991–38999.
- Blankenship RE, Harman H.** 1998. The origin and evolution of oxygenic photosynthesis. *Trends in Biochemical Science* **23**, 94–97.
- Carpene X, Loprasert S, Mongkolsuk S, Switala J, Loewen PC, Fita I.** 2003. Catalase-peroxidase KatG of *Burkholderia pseudomallei* at 1.7 Å resolution. *Journal of Molecular Biology* **327**, 475–489.
- Chelikani P, Fita I, Loewen PC.** 2004. Diversity of structures and properties among catalases. *Cellular and Molecular Life Sciences* **61**, 192–208.
- Colin C, Leblanc C, Michel G, Wagner E, Leize-Wagner E, Van Dorsselaer A, Potin P.** 2005. Vanadium-dependent iodoperoxidases in *Laminaria digitata*, a novel biochemical function diverging from brown algal bromoperoxidases. *Journal of Biological Inorganic Chemistry* **10**, 156–66.
- Dietz KJ.** 2003. Plant peroxiredoxins. *Annual Review of Plant Biology* **54**, 93–107.
- Dietz KJ, Stork T, Finkemeier I, Lamkemeyer P, Li WX, El-Tayeb MA, Michel KP, Pistorius EK, Baier M.** 2005. The role of peroxiredoxins in oxygenic photosynthesis of cyanobacteria and higher plants: peroxide detoxification or redox sensing? In: Demmig-Adams B, Adams W, Mattoo A, eds. *Photoprotection, photoinhibition, and environment*. Dordrecht: Kluwer Academic Press, 303–319.
- Donald LJ, Krokhin OV, Duckworth HW, Wiseman B, Deemagarn T, Singh R, Switala J, Carpena X, Fita I, Loewen PC.** 2003. Characterization of the catalase-peroxidase KatG from *Burkholderia pseudomallei* by mass spectrometry. *Journal of Biological Chemistry* **278**, 35687–35692.
- Echalier A, Goodhew CF, Pettigrew GW, Fülöp V.** 2006. Activation and catalysis of the di-heme cytochrome *c* peroxidase from *Paracoccus pantotrophus*. *Structure* **14**, 107–117.
- Engleder M, Regelsberger G, Jakopitsch C, Furtmüller PG, Rümer F, Peschek GA, Obinger C.** 2000. Nucleotide sequence analysis, overexpression in *Escherichia coli* and kinetic characterization of *Anacyctis nidulans* catalase-peroxidase. *Biochimie* **82**, 211–219.
- Fülöp V, Ridout CJ, Greenwood C, Hajdu J.** 1995. Crystal structure of the di-haem cytochrome *c* peroxidase from *Pseudomonas aeruginosa*. *Structure* **3**, 1225–1233.
- Furtmüller PG, Zederbauer M, Jantschko W, Helm J, Bogner M, Jakopitsch C, Obinger C.** 2006. Active site structure and catalytic mechanisms of human peroxidases. *Archives of Biochemistry and Biophysics* **445**, 199–213.
- Gaber A, Tamoi T, Takeda Y, Nakano S, Shigeoka S.** 2001. NADPH-dependent glutathione peroxidase-like proteins (Gpx-1, Gpx-2) reduce unsaturated fatty acid hydroperoxides in *Synechocystis* PCC 6803. *FEBS Letters* **499**, 32–36.

- Heering HA, Indiani C, Regelsberger G, Jakopitsch C, Obinger C, Smulevich G.** 2002. New insights into the heme cavity structure of catalase-peroxidase: a spectroscopic approach to the recombinant *Synechocystis* enzyme and selected distal cavity mutants. *Biochemistry* **41**, 9237–9247.
- Hong S-K, Cha M-K, Kim I-H.** 2008. A glutaredoxin-fused thiol peroxidase acts as an important player in hydrogen peroxide detoxification in late-phased growth of *Anabaena* sp. PCC7120. *Archives of Biochemistry and Biophysics* **475**, 42–49.
- Horling F, König J, Dietz KJ.** 2002. Type II peroxiredoxin C, a member of the peroxiredoxin family in *Arabidopsis thaliana*: its expression and activity in comparison with other peroxiredoxins. *Plant Physiology and Biochemistry* **40**, 491–499.
- Horling F, Lamkemeyer P, König J, Finkemeier I, Kandlbinder A, Baier M, Dietz KJ.** 2003. Divergent light-, ascorbate-, and oxidative stress-dependent regulation of expression of the peroxiredoxin gene family in *Arabidopsis*. *Plant Physiology* **131**, 317–325.
- Hossain MA, Asada K.** 1984. Purification of dehydroascorbate reductase from spinach and its characterization as a thiol enzyme. *Plant and Cell Physiology* **25**, 85–92.
- Hossain MA, Asada K.** 1985. Monodehydroascorbate reductase from cucumber is a flavin adenine dinucleotide enzyme. *Journal of Biological Chemistry* **260**, 12920–12926.
- Hosaya-Matsuda B, Motohashi K, Yoshimura H, Nozaki A, Inoue K, Ohmuri M, Hisabori T.** 2005. Anti-oxidative stress system in cyanobacteria. Significance of type II peroxiredoxin and the role of 1-Cys peroxiredoxin in *Synechocystis* sp. strain PCC 6803. *Journal of Biological Chemistry* **280**, 840–846.
- Ivancich A, Jakopitsch C, Auer M, Un S, Obinger C.** 2003. Protein-based radicals in the catalase-peroxidase of *Synechocystis* PCC6803: a multifrequency EPR investigation of wild-type and variants on the environment of the heme active site. *Journal of the American Chemical Society* **125**, 14093–14102.
- Jakopitsch C, Droghetti E, Schmuckenschlager F, Furtmüller PG, Smulevich G, Obinger C.** 2005. The role of the main access channel of catalase-peroxidase in catalysis. *Journal of Biological Chemistry* **280**, 42411–42422.
- Jakopitsch C, Ivancich A, Schmuckenschlager F, Wanasinghe A, Pörtl G, Furtmüller PG, Rüter F, Obinger C.** 2004. Influence of the unusual covalent adduct on the kinetics and formation of radical intermediates in *Synechocystis* catalase peroxidase. *Journal of Biological Chemistry* **279**, 46082–46095.
- Jakopitsch C, Kolarich D, Petutschnig G, Furtmüller PG, Obinger C.** 2003. Distal side tryptophan, tyrosine and methionine in catalase-peroxidases are covalently linked in solution. *FEBS Letters* **552**, 135–140.
- Jakopitsch C, Regelsberger G, Furtmüller PG, Rüter F, Peschek GA, Obinger C.** 2001. Catalase-peroxidase from *Synechocystis* is capable of chlorination and bromination reactions. *Biochemical and Biophysical Research Communications* **287**, 682–687.
- Jakopitsch C, Rüter F, Regelsberger G, Dockal F, Peschek GA, Obinger C.** 1999. Catalase-peroxidase from the cyanobacterium *Synechocystis* PCC 6803: cloning, overexpression in *Escherichia coli*, and kinetic characterization. *Biological Chemistry* **380**, 1087–1096.
- Jakopitsch C, Vlasits J, Wiseman B, Loewen PC, Obinger C.** 2007. Redox intermediates in the catalase cycle of catalase-peroxidases from *Synechocystis* PCC 6803, *Burkholderia pseudomallei*, and *Mycobacterium tuberculosis*. *Biochemistry* **46**, 1183–1193.
- Jeanmougin F, Thompson JD, Gouy M, Higgins DG, Gibson TJ.** 1998. Multiple sequence alignment with Clustal X. *Trends in Biochemical Science* **23**, 403–405.
- Klughammer B, Baier M, Dietz KJ.** 1998. Inactivation by gene disruption of 2-cysteine-peroxiredoxin in *Synechocystis* sp. PCC6803 leads to increased stress sensitivity. *Physiologia Plantarum* **104**, 699–706.
- Kobayashi M, Ishizuka T, Katayama M, Kanehisa M, Bhattacharyya-Pakrasi M, Pakrasi HB, Ikeuchi M.** 2004. Response to oxidative stress involves a novel peroxiredoxin gene in the unicellular cyanobacterium *Synechocystis* sp. PCC 6803. *Plant and Cell Physiology* **45**, 290–299.
- Kong W, Shiota S, Shi Y, Nakayama H, Nakayama K.** 2000. A novel peroxiredoxin of the plant *Sedum lineare* is a homologue of *Escherichia coli* bacterioferritin co-migratory protein (Bcp). *Biochemical Journal* **351**, 107–114.
- König J, Naier M, Horling F, Kahmann U, Harris G, Schurmann P, Dietz KJ.** 2002. The plant-specific function of 2-Cys peroxiredoxin-mediated detoxification of peroxides in the redox-hierarchy of photosynthetic electron flux. *Proceedings of the National Academy of Sciences, USA* **99**, 5738–5743.
- Lamkemeyer P, Finkemeier I, Kandlbinder A, Baier M, Dietz KJ.** 2003. The role of peroxiredoxin Q in the antioxidant defence system of the chloroplast. *Free Radical Research Supplement* **37**, 40.
- Lane N.** 2002. *Oxygen. The molecule that made the world*. Oxford University Press.
- Lassmann T, Sonnhammer ELL.** 2005. Kalign—an accurate and fast multiple sequence alignment algorithm. *BMC Bioinformatics* **6**, 298–332.
- Li H, Singh AK, McIntyre LM, Sherman LA.** 2004. Differential gene expression in response to hydrogen peroxide and the putative PerR regulon of *Synechocystis* sp. strain PCC6803. *Journal of Bacteriology* **186**, 3331–3345.
- Littlechild J.** 1999. Haloperoxidases and their role in biotransformation reactions. *Current Opinion in Chemical Biology* **3**, 28–34.
- Low FM, Hampton MB, Winterbourn CC.** 2008. Peroxiredoxin 2 and peroxide metabolism in the erythrocyte. *Antioxidants and Redox Signaling* **10**, 1–9.
- Margis R, Dunand C, Teixeira FK, Margis-Pinheiro M.** 2008. Glutathione peroxidase family—an evolutionary overview. *FEBS Journal* **275**, 3959–3970.
- McKay CP, Hartman H.** 1991. Hydrogen peroxide and the evolution of photosynthesis. *Origins of Life and Evolution of the Biosphere* **21**, 157–163.
- Miyake C, Michihata F, Asada K.** 1991. Scavenging of hydrogen peroxide in prokaryotic and eukaryotic algae: acquisition of ascorbate peroxidase during the evolution of cyanobacteria. *Plant and Cell Physiology* **32**, 33–43.
- Miller AG, Hunter KJ, O’Leary SJB, Hart LJ.** 2000. The photoreduction of H<sub>2</sub>O<sub>2</sub> by *Synechococcus* sp. PCC7942 and UTEX 625. *Plant Physiology* **123**, 625–635.

- Mutsuda M, Ishikawa T, Takeda T, Shigeoka S.** 1996. The catalase-peroxidase of *Synechococcus* PCC 7942: purification, nucleotide sequence analysis and expression in *Escherichia coli*. *Biochemical Journal* **316**, 251–257.
- Oldham ML, Brash AR, Newcomer ME.** 2005. The structure of coral allene oxide synthase reveals a catalase adapted for metabolism of a fatty acid hydroperoxide. *Proceedings of the National Academy of Science, USA* **102**, 297–302.
- Passardi F, Zamocky M, Favet J, Jakopitsch C, Penel C, Obinger C, Dunand C.** 2007. Phylogenetic distribution of catalase-peroxidases: are there patches of order in chaos? *Gene* **397**, 101–113.
- Perelman A, Avraham U, Hacoheh D, Schwarz R.** 2003. Oxidative stress in *Synechococcus* sp. strain PCC7942: various mechanisms for H<sub>2</sub>O<sub>2</sub> detoxification with different physiological roles. *Journal of Bacteriology* **185**, 3654–3660.
- Rasmussen B, Fletcher IR, Brocks JJ, Kilburn MR.** 2008. Reassessing the first appearance of eukaryotes and cyanobacteria. *Nature* **455**, 1101–1104.
- Regelsberger G, Jakopitsch C, Plasser L, Schwaiger H, Furtmüller PG, Zamocky M, Peschek GA, Obinger C.** 2002. Occurrence and biochemistry of hydroperoxidases in oxygenic phototrophic prokaryotes (cyanobacteria). *Plant Physiology and Biochemistry* **40**, 479–490.
- Rouhier N, Jacquot J-P.** 2005. The plant multigenic family of thiol peroxidases. *Free Radical Biology and Medicine* **38**, 1413–1421.
- Samuilov VD, Bezryadnov DV, Gusev MV, Kitashov AV, Fedorenko TA.** 1999. Hydrogen peroxide inhibits the growth of cyanobacteria. *Biochemistry* **64**, 47–53.
- Singh R, Wiseman B, Deemagarn T, Donald LJ, Duckworth HW, Carpena X, Fita I, Loewen PC.** 2004. Catalase-peroxidases (KatG) exhibit NADH oxidase activity. *Journal of Biological Chemistry* **279**, 43098–43106.
- Smulevich G, Jakopitsch G, Droghetti E, Obinger C.** 2006. Probing the bifunctionality of catalase-peroxidase (KatG). *Journal of Inorganic Biochemistry* **100**, 568–585.
- Stacy RA, Munthe E, Steinum T, Sharma B, Aalen RB.** 1996. A peroxiredoxin antioxidant is encoded by a dormancy-related gene, Per1, expressed during late development in the aleurone and embryo of barley grains. *Plant Molecular Biology* **31**, 1205–1216.
- Stork T, Michel K-P, Pistorius EK, Dietz K-J.** 2005. Bioinformatic analysis of the genomes of the cyanobacteria *Synechocystis* sp. PCC 6803 and *Synechococcus elongatus* PCC 7942 for the presence of peroxiredoxins and their transcript regulation under stress. *Journal of Experimental Botany* **56**, 3193–3206.
- Tamura K, Dudley J, Nei M, Kumar S.** 2007. MEGA4: molecular evolutionary genetics analysis (MEGA) software version 4.0. *Molecular Biological Evolution* **24**, 1596–1599.
- Tanaka T, Izawa S, Inoue Y.** 2005. GPX2, encoding a phospholipid hydroperoxide glutathione peroxidase homologue, codes for an atypical 2-Cys peroxiredoxin in *Saccharomyces cerevisiae*. *Journal of Biological Chemistry* **280**, 42078–42087.
- Tel-Or E, Huflejt M, Packer L.** 1985. The role of glutathione and ascorbate in hydroperoxide removal in cyanobacteria. *Biochemical and Biophysical Research Communications* **132**, 533–539.
- Tichy M, Vermaas W.** 1999. *In vivo* role of catalase-peroxidase in *Synechocystis* sp. strain PCC6803. *Journal of Bacteriology* **181**, 1875–1882.
- Tözüm SRD, Gallon JR.** 1979. The role of glutathione and ascorbate in hydroperoxide removal in cyanobacteria. *Journal of Genetic Microbiology* **111**, 313–326.
- Veal EA, Findlay VJ, Day AM, Bozonet SM, Evans JM, Quinn J, Morgan BA.** 2004. A 2-Cys peroxiredoxin regulates peroxide-induced oxidation and activation of a stress-activated MAP kinase. *Molecular Cell* **15**, 129–139.
- Wada K, Tada T, Nakamura Y, Kinoshita T, Tamoi M, Shigeoka S, Nishimura K.** 2002. Crystallization and preliminary X-ray diffraction studies of catalase-peroxidase from *Synechococcus* PCC7942. *Acta Crystallographica D* **58**, 157–159.
- Welinder KG.** 1991. Bacterial catalase-peroxidases are gene duplicated members of the plant peroxidase superfamily. *Biochimica et Biophysica Acta* **1080**, 215–20.
- Welinder KG.** 1992. Superfamily of plant, fungal and bacterial peroxidases. *Current Opinion in Structural Biology* **2**, 388–393.
- Weyand M, Hecht H-J, Kieß M, Liaud M-F, Vilter H, Schomburg D.** 1999. X-ray structure determination of a vanadium-dependent haloperoxidase from *Ascophyllum nodosum* at 2.0 Å resolution. *Journal of Molecular Biology* **293**, 595–611.
- Whittaker MM, Barynin VV, Igarashi T, Whittaker JW.** 2003. Outer sphere mutagenesis of *Lactobacillus plantarum* manganese catalase disrupts the cluster core. *European Journal of Biochemistry* **270**, 1102–1116.
- Wood ZA, Schroder E, Robin Harris J, Poole LB.** 2003. Structure, mechanism and regulation of peroxiredoxins. *Trends in Biochemical Science* **28**, 32–40.
- Yamada Y, Fujiwara T, Sato T, Igarashi N, Tanaka N.** 2002. The 2.0 Å crystal structure of catalase-peroxidase from *Haloarcula marismortui*. *Nature Structure Biology* **9**, 691–695.
- Yamamoto H, Miyake C, Dietz K-J, Tomizawa K-I, Murata N, Yokota A.** 1999. Thioredoxin peroxidase in the cyanobacterium *Synechocystis* sp. PCC6803. *FEBS Letters* **447**, 269–273.
- Zhao X, Yu H, Yu S, Wang F, Sacchettini JC, Magliozzo RS.** 2006. Hydrogen peroxide-mediated isoniazid activation catalyzed by *Mycobacterium tuberculosis* catalase-peroxidase (KatG) and its S315T mutant. *Biochemistry* **45**, 4131–4140.
- Zamocky M, Furtmüller PG, Obinger C.** 2008a. Evolution of catalases from bacteria to humans. *Antioxidants and Redox Signaling* **10**, 1527–1547.
- Zamocky M, Jakopitsch C, Furtmüller PG, Dunand C, Obinger C.** 2008b. The peroxidase-cytochrome P450 superfamily: reconstructed evolution of critical enzymes of the innate immune system. *Proteins* **71**, 589–605.
- Zamocky M, Regelsberger G, Jakopitsch C, Obinger C.** 2001. The molecular peculiarities of catalase-peroxidases. *FEBS Letters* **492**, 177–182.
- Zubieta C, Krishna SS, Kapoor M, et al.** 2007. Crystal structures of two novel dye-decolorizing peroxidases reveal a β-barrel fold with a conserved heme binding motif. *Proteins* **70**, 223–233.
